# Supplementary material for: Within-Host Genetic Variation in Neisseria gonorrhoeae over the Course of Infection
Source: PubMed Central journal article supplement (PMC9241688; doi:10.1128/spectrum.00313-22), 2022-04-25
Supplement: spectrum.00313-22-s001.pdf [file spectrum.00313-22-s001.pdf]

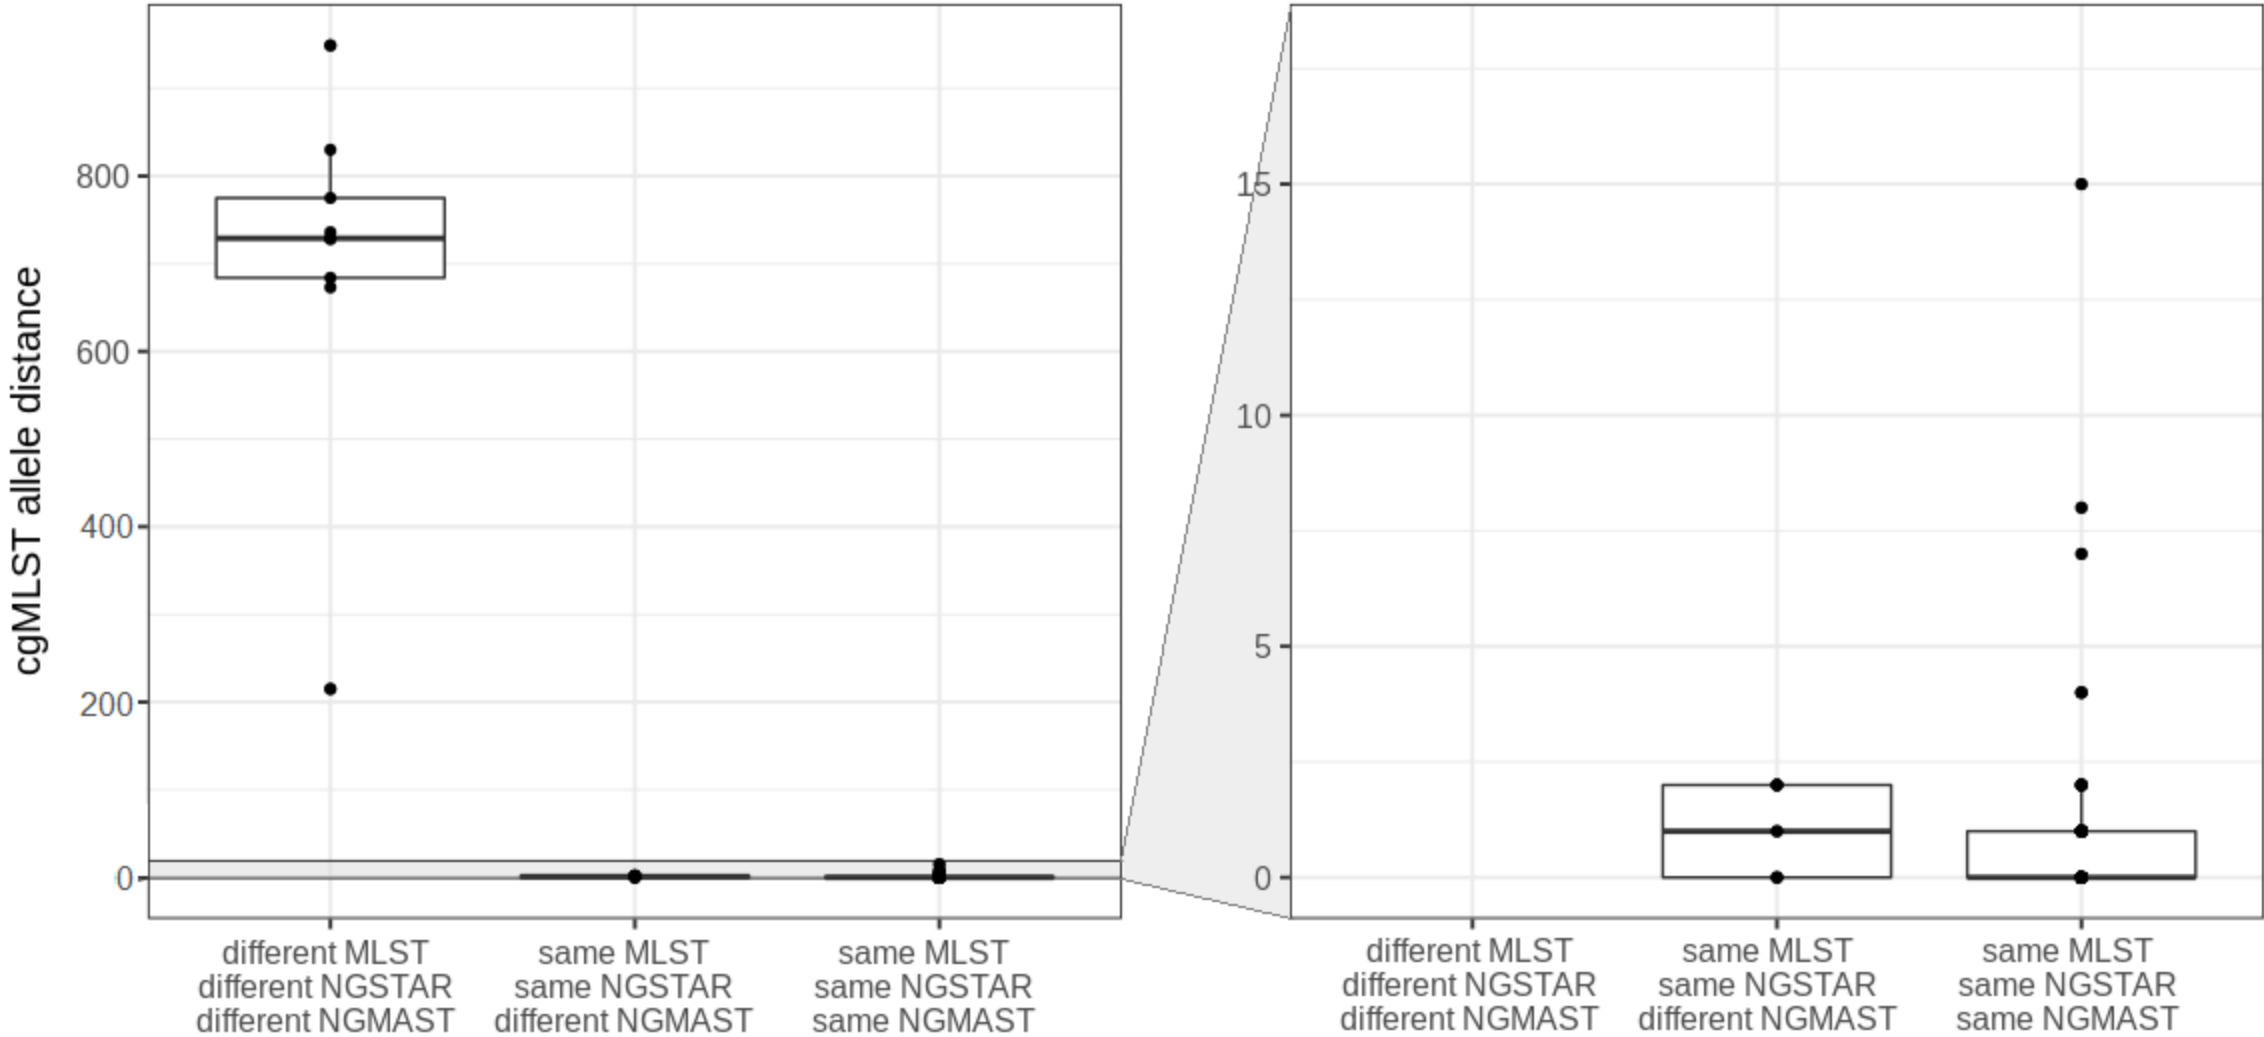

**Figure S1. Gene-based typing results versus core genome MLST (cgMLST) allele distances in within-host isolate pairs.** Isolates in within-host times-pairs and locations-pairs were compared by MLST, NG-STAR, NG-MAST STs and cgMLST allele distance. High cgMLST allele distances were found between isolates with different MLST, NG-STAR and NG-MAST STs whereas isolates that differed in NG-MAST only or isolates with identical MLST, NG-STAR and NG-MAST STs had comparable cgMLST allele distances. The right panel magnifies the lower values on the Y-axis, which confirms that comparable allele distances were found between isolates with different NG-MAST compared to isolates with identical STs.

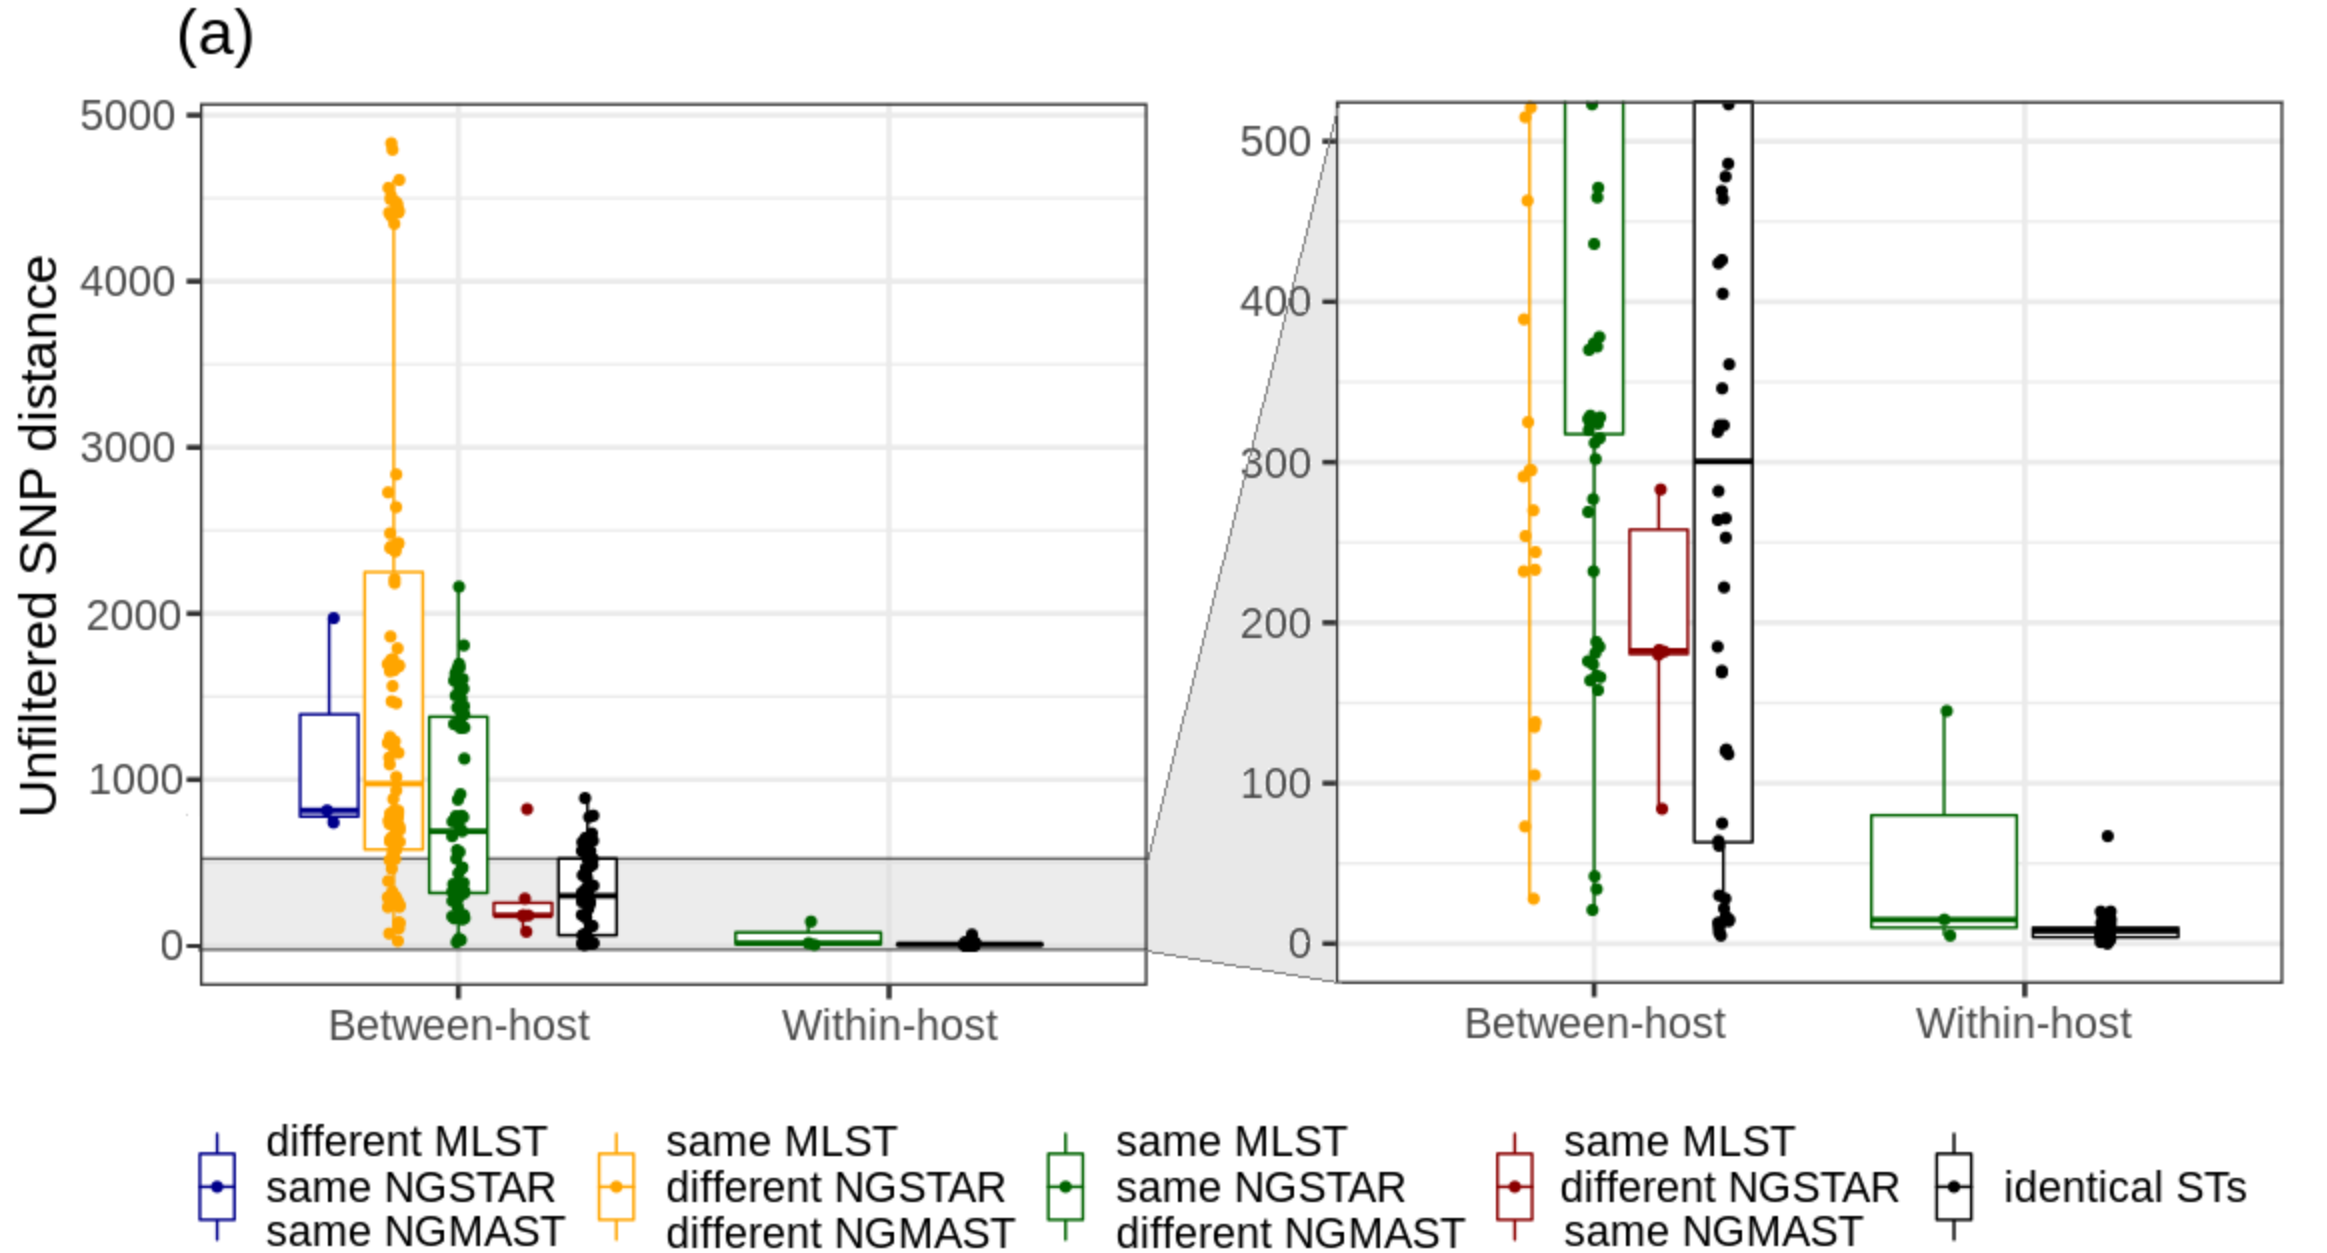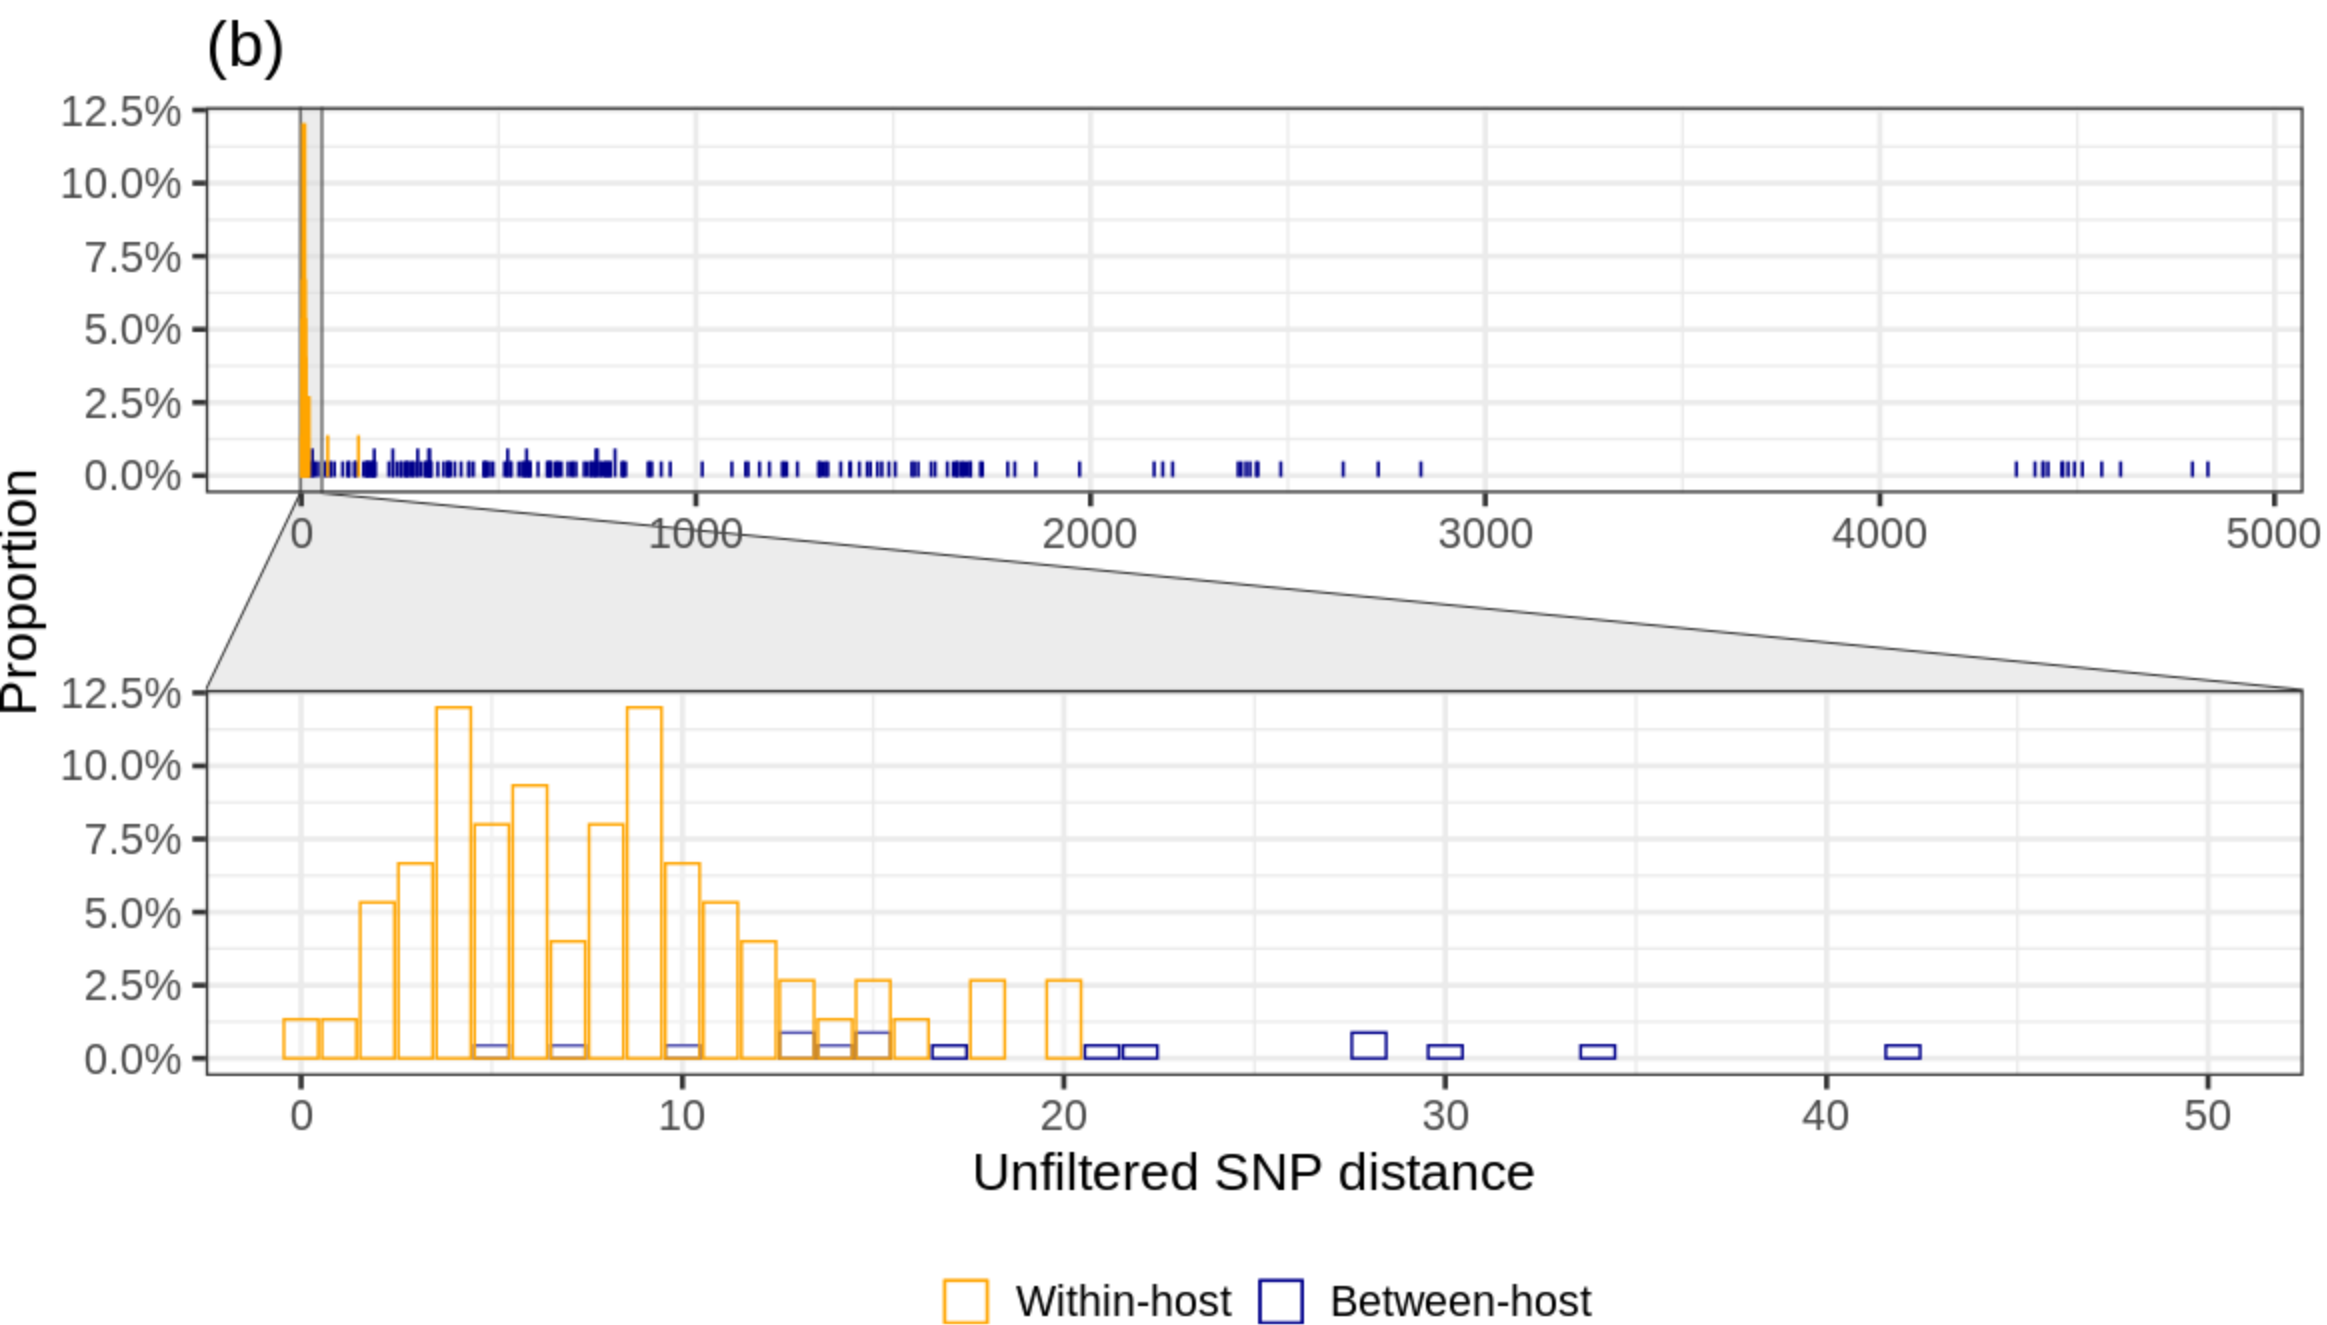

**Figure S2. SNP distances in within-host and between-host isolate pairs without recombination filtering.** (a) Unfiltered SNP distances in within-host and between-host isolate pairs, categorized on MLST, NG-STAR and NG-MAST typing results. Isolate pairs with different MLST, NG-STAR and NG-MAST STs were excluded. (b) Proportions of SNP distances found in all within-host pairs (75 pairs) and between-host pairs (228 pairs). Isolate pairs with different MLST, NG-STAR and NG-MAST STs were excluded.

**Table S1. List of isolates included in the study with corresponding isolate- and participant metadata.**

| Participant number | Isolate number | ENA accession number | Year of isolation | pubMLST ID | Coverage of FA1090 (%) | Mean coverage depth (times) | Sex  | Sex group | Allocated treatment arm | Anatomical location | Sample type                 | NGMAST v2.0 | MLST  | NG-STAR |
|--------------------|----------------|----------------------|-------------------|------------|------------------------|-----------------------------|------|-----------|-------------------------|---------------------|-----------------------------|-------------|-------|---------|
| P01                | NG_AMS0386     | ERS9194795           | 2017              | 99928      | 98.6                   | 314                         | male | MSM       | fosfomycin              | Proctum             | Times-pair                  | 12547       | 10314 | 1387    |
| P01                | NG_AMS0388     | ERS9194796           | 2017              | 99977      | 98.6                   | 516                         | male | MSM       | fosfomycin              | Proctum             | Times-pair                  | 12547       | 10314 | 1387    |
| P01                | NG_AMS0382     | ERS9194791           | 2017              | 100026     | 98.6                   | 495                         | male | MSM       | fosfomycin              | Proctum             | Times-pair                  | 12547       | 10314 | 1387    |
| P02                | NG_AMS0384     | ERS9194793           | 2017              | 99914      | 99                     | 526                         | male | MSM       | gentamycin              | Pharynx             | Locations-pair + times-pair | 292         | 8122  | 299     |
| P02                | NG_AMS0385     | ERS9194794           | 2017              | 99915      | 99                     | 497                         | male | MSM       | gentamycin              | Pharynx             | Times-pair                  | 292         | 8122  | 299     |
| P02                | NG_AMS0383     | ERS9194792           | 2017              | 99913      | 99                     | 437                         | male | MSM       | gentamycin              | Urethra             | Locations-pair              | 292         | 8122  | 299     |
| P03                | NG_AMS0389     | ERS9194797           | 2017              | 100072     | 98.9                   | 520                         | male | MSM       | fosfomycin              | Proctum             | Times-pair                  | 12302       | 9363  | UNKN01  |
| P03                | NG_AMS0396     | ERS9194804           | 2017              | 100064     | 98.8                   | 482                         | male | MSM       | fosfomycin              | Proctum             | Times-pair                  | 12302       | 9363  | UNKN01  |
| P03                | NG_AMS0399     | ERS9194807           | 2017              | 100051     | 98.8                   | 512                         | male | MSM       | fosfomycin              | Proctum             | Times-pair                  | 12302       | 9363  | UNKN01  |
| P04                | NG_AMS0390     | ERS9194798           | 2017              | 100047     | 98.8                   | 571                         | male | MSM       | ceftriaxon              | Proctum             | Locations-pair              | 17459       | 9363  | 301     |
| P04                | NG_AMS0391     | ERS9194799           | 2017              | 100040     | 98.8                   | 458                         | male | MSM       | ceftriaxon              | Pharynx             | Locations-pair              | 17459       | 9363  | 301     |
| P05                | NG_AMS0392     | ERS9194800           | 2017              | 99972      | 98.5                   | 551                         | male | MSM       | gentamycin              | Proctum             | Locations-pair              | 5441        | 8156  | 442     |
| P05                | NG_AMS0393     | ERS9194801           | 2017              | 99973      | 98.2                   | 139                         | male | MSM       | gentamycin              | Pharynx             | Locations-pair + times-pair | 5441        | 8156  | 442     |
| P05                | NG_AMS0401     | ERS9194809           | 2017              | 99923      | 98.5                   | 465                         | male | MSM       | gentamycin              | Pharynx             | Times-pair                  | 13784       | 8156  | 442     |
| P06                | NG_AMS0395     | ERS9194803           | 2017              | 99929      | 98.5                   | 546                         | male | MSM       | ertapenem               | Proctum             | Locations-pair              | 5441        | 8156  | 442     |
| P06                | NG_AMS0394     | ERS9194802           | 2017              | 99978      | 98.5                   | 519                         | male | MSM       | ertapenem               | Urethra             | Locations-pair              | 5441        | 8156  | 442     |
| P07                | NG_AMS0397     | ERS9194805           | 2017              | 100011     | 98.9                   | 572                         | male | MSM       | ertapenem               | Proctum             | Locations-pair              | 5964        | 12093 | 139     |
| P07                | NG_AMS0398     | ERS9194806           | 2017              | 99986      | 98.9                   | 614                         | male | MSM       | ertapenem               | Pharynx             | Locations-pair              | 5964        | 12093 | 139     |
| P08                | NG_AMS0400     | ERS9194808           | 2017              | 100056     | 98.9                   | 472                         | male | MSM       | fosfomycin              | Proctum             | Times-pair                  | 12302       | 9363  | 168     |
| P08                | NG_AMS0403     | ERS9194811           | 2017              | 100066     | 98.9                   | 599                         | male | MSM       | fosfomycin              | Proctum             | Locations-pair + times-pair | 12302       | 9363  | 168     |
| P08                | NG_AMS0410     | ERS9194818           | 2017              | 100073     | 98.9                   | 527                         | male | MSM       | fosfomycin              | Proctum             | Locations-pair + times-pair | 12302       | 9363  | 168     |
| P08                | NG_AMS0402     | ERS9194810           | 2017              | 100065     | 98.9                   | 592                         | male | MSM       | fosfomycin              | Pharynx             | Locations-pair + times-pair | NEW1        | 9363  | 168     |
| P08                | NG_AMS0409     | ERS9194817           | 2017              | 100067     | 98.9                   | 532                         | male | MSM       | fosfomycin              | Pharynx             | Locations-pair + times-pair | NEW1        | 9363  | 168     |
| P09                | NG_AMS0404     | ERS9194812           | 2017              | 100009     | 98.6                   | 517                         | male | MSM       | fosfomycin              | Urethra             | Times-pair                  | 14994       | 7822  | 1387    |
| P09                | NG_AMS0413     | ERS9194821           | 2017              | 99959      | 98.5                   | 449                         | male | MSM       | fosfomycin              | Urethra             | Times-pair                  | 14994       | 7822  | 1387    |
| P10                | NG_AMS0406     | ERS9194814           | 2017              | 99904      | 98.5                   | 566                         | male | MSM       | ceftriaxon              | Proctum             | Locations-pair              | 10386       | 7827  | 38      |

|     |              |            |      |        |      |     |      |     |            |         |                                |        |       |        |
|-----|--------------|------------|------|--------|------|-----|------|-----|------------|---------|--------------------------------|--------|-------|--------|
| P10 | NG_AMS0405   | ERS9194813 | 2017 | 99903  | 98.6 | 505 | male | MSM | ceftriaxon | Urethra | Locations-pair                 | 10386  | 7827  | 38     |
| P10 | NG_AMS0407   | ERS9194815 | 2017 | 100007 | 98.6 | 430 | male | MSM | ceftriaxon | Pharynx | Locations-pair                 | 16020  | 10314 | UNKN02 |
| P11 | NG_AMS0408   | ERS9194816 | 2017 | 100068 | 98.9 | 458 | male | MSM | fosfomycin | Urethra | Times-pair                     | 12302  | 9363  | 168    |
| P11 | NG_AMS0414   | ERS9194822 | 2017 | 100074 | 98.9 | 537 | male | MSM | fosfomycin | Urethra | Times-pair                     | 12302  | 9363  | 168    |
| P12 | NG_AMS0412   | ERS9194820 | 2017 | 99924  | 98.5 | 532 | male | bi  | fosfomycin | Proctum | Locations-pair +<br>times-pair | 11461  | 1599  | 520    |
| P12 | NG_AMS0417   | ERS9194825 | 2017 | 99925  | 98.5 | 510 | male | bi  | fosfomycin | Proctum | Locations-pair +<br>times-pair | 11461  | 1599  | 520    |
| P12 | NG_AMS0411   | ERS9194819 | 2017 | 99974  | 98.5 | 561 | male | bi  | fosfomycin | Urethra | Locations-pair +<br>times-pair | 11461  | 1599  | 520    |
| P12 | NG_AMS0418   | ERS9194826 | 2017 | 99975  | 98.6 | 564 | male | bi  | fosfomycin | Urethra | Locations-pair +<br>times-pair | 11461  | 1599  | 520    |
| P13 | NG_AMS0416   | ERS9194824 | 2017 | 100013 | 98.7 | 496 | male | MSM | ertapenem  | Pharynx | Locations-pair                 | 9918   | NEW1  | 436    |
| P13 | NG_AMS0415   | ERS9194823 | 2017 | 100012 | 98.7 | 469 | male | MSM | ertapenem  | Urethra | Locations-pair                 | 9918   | NEW1  | 436    |
| P14 | NG_AMS0419   | ERS9194827 | 2017 | 99909  | 98.7 | 595 | male | MSM | ceftriaxon | Pharynx | Locations-pair                 | 15058  | 11971 | 2538   |
| P14 | NG_AMS0420   | ERS9194828 | 2017 | 100016 | 98.6 | 494 | male | MSM | ceftriaxon | Proctum | Locations-pair                 | 16065  | 10314 | 1615   |
| P15 | NG_AMS0421   | ERS9194829 | 2017 | 99995  | 98.8 | 435 | male | MSM | fosfomycin | Proctum | Times-pair                     | 13470  | 8145  | 3651   |
| P15 | NG_AMS0422   | ERS9194830 | 2017 | 99943  | 98.8 | 583 | male | MSM | fosfomycin | Proctum | Times-pair                     | 13470  | 8145  | 3651   |
| P16 | NG_AMS0424   | ERS9194832 | 2017 | 100076 | 98.9 | 493 | male | MSM | ertapenem  | Pharynx | Locations-pair                 | UNKN01 | 11422 | 2953   |
| P16 | NG_AMS0423   | ERS9194831 | 2017 | 100075 | 98.9 | 483 | male | MSM | ertapenem  | Urethra | Locations-pair                 | UNKN01 | 11422 | 2953   |
| P17 | NG_AMS0425   | ERS9194833 | 2017 | 99901  | 98.5 | 481 | male | MSM | fosfomycin | Urethra | Times-pair                     | 11461  | 1599  | 520    |
| P17 | NG_AMS0428   | ERS9194836 | 2017 | 99895  | 98.5 | 419 | male | MSM | fosfomycin | Urethra | Times-pair                     | 11461  | 1599  | 520    |
| P18 | NG_AMS0427   | ERS9194835 | 2017 | 99961  | 98.7 | 443 | male | MSM | ertapenem  | Proctum | Locations-pair                 | 5624   | 8143  | 426    |
| P18 | NG_AMS0426   | ERS9194834 | 2017 | 99960  | 98.7 | 474 | male | MSM | ertapenem  | Pharynx | Locations-pair                 | 5624   | 8143  | 426    |
| P19 | NG_AMS0429   | ERS9194837 | 2017 | 100030 | 98.8 | 493 | male | MSM | fosfomycin | Proctum | Times-pair                     | NEW8   | 11428 | 63     |
| P19 | NG_AMS0431   | ERS9194839 | 2017 | 100044 | 98.8 | 533 | male | MSM | fosfomycin | Proctum | Times-pair                     | NEW8   | 11428 | 63     |
| P19 | NG_AMS0433   | ERS9194841 | 2018 | 100032 | 98.8 | 505 | male | MSM | fosfomycin | Proctum | Times-pair                     | NEW8   | 11428 | 63     |
| P20 | NG_AMS0430   | ERS9194838 | 2017 | 100031 | 98.8 | 501 | male | MSM | fosfomycin | Proctum | Times-pair                     | 4995   | 7822  | 3321   |
| P20 | NG_AMS0432   | ERS9194840 | 2017 | 100045 | 98.8 | 415 | male | MSM | fosfomycin | Proctum | Times-pair                     | 4995   | 7822  | 3321   |
| P21 | NG_AMS0435   | ERS9194842 | 2018 | 100037 | 98.6 | 472 | male | MSM | fosfomycin | Proctum | Times-pair                     | 1407   | 1901  | UNKN03 |
| P21 | NG_AMS0165_2 | ERS9194781 | 2018 | 100038 | 98.6 | 461 | male | MSM | fosfomycin | Proctum | Times-pair                     | 1407   | 1901  | UNKN03 |
| P21 | NG_AMS0166_2 | ERS9194782 | 2018 | 100039 | 98.6 | 464 | male | MSM | fosfomycin | Proctum | Times-pair                     | 1407   | 1901  | UNKN03 |
| P22 | NG_AMS0436   | ERS9194843 | 2018 | 101901 | 98.8 | 532 | male | MSM | gentamycin | Urethra | Locations-pair                 | 13489  | 13734 | 3171   |
| P22 | NG_AMS0437   | ERS9194844 | 2018 | 101902 | 98.8 | 502 | male | MSM | gentamycin | Pharynx | Locations-pair +<br>times-pair | 12302  | 9363  | 168    |
| P22 | NG_AMS0438   | ERS9194845 | 2018 | 101903 | 98.9 | 590 | male | MSM | gentamycin | Pharynx | Times-pair                     | 12302  | 9363  | 168    |
| P23 | NG_AMS0439   | ERS9194846 | 2018 | 99920  | 98.7 | 452 | male | MSM | fosfomycin | Urethra | Times-pair                     | 1195   | 1580  | 182    |
| P23 | NG_AMS0440   | ERS9194847 | 2018 | 99921  | 98.7 | 497 | male | MSM | fosfomycin | Urethra | Times-pair                     | 1195   | 1580  | 182    |
| P24 | NG_AMS0442   | ERS9194849 | 2018 | 100062 | 98.9 | 496 | male | MSM | fosfomycin | Proctum | Times-pair                     | 12302  | 9363  | 168    |

|     |              |            |      |        |      |     |      |        |            |         |                             |        |       |      |
|-----|--------------|------------|------|--------|------|-----|------|--------|------------|---------|-----------------------------|--------|-------|------|
| P24 | NG_AMS0447   | ERS9194854 | 2018 | 100071 | 98.8 | 512 | male | MSM    | fosfomycin | Proctum | Times-pair                  | 12302  | 9363  | 168  |
| P25 | NG_AMS0441   | ERS9194848 | 2018 | 99938  | 98.5 | 454 | male | MSM    | fosfomycin | Urethra | Times-pair                  | 14764  | 1599  | 520  |
| P25 | NG_AMS0443   | ERS9194850 | 2018 | 99939  | 98.5 | 606 | male | MSM    | fosfomycin | Urethra | Times-pair                  | 14764  | 1599  | 520  |
| P26 | NG_AMS0445   | ERS9194852 | 2018 | 99996  | 98.8 | 451 | male | MSM    | fosfomycin | Proctum | Locations-pair              | 4995   | 7822  | 3321 |
| P26 | NG_AMS0444   | ERS9194851 | 2018 | 99944  | 98.8 | 584 | male | MSM    | fosfomycin | Urethra | Locations-pair + times-pair | 4995   | 7822  | 3321 |
| P26 | NG_AMS0449   | ERS9194855 | 2018 | 99945  | 98.8 | 380 | male | MSM    | fosfomycin | Urethra | Times-pair                  | 4995   | 7822  | 3321 |
| P27 | NG_AMS0446   | ERS9194853 | 2018 | 99947  | 98.5 | 460 | male | MSM    | fosfomycin | Proctum | Times-pair                  | UNKN02 | 8156  | 442  |
| P27 | NG_AMS0451   | ERS9194857 | 2018 | 99916  | 98.5 | 551 | male | MSM    | fosfomycin | Proctum | Locations-pair + times-pair | UNKN02 | 8156  | 442  |
| P27 | NG_AMS0452   | ERS9194858 | 2018 | 99917  | 98.5 | 399 | male | MSM    | fosfomycin | Proctum | Locations-pair + times-pair | UNKN02 | 8156  | 442  |
| P27 | NG_AMS0450   | ERS9194856 | 2018 | 100001 | 98.5 | 563 | male | MSM    | fosfomycin | Pharynx | Locations-pair + times-pair | UNKN03 | 8156  | 442  |
| P27 | NG_AMS0453   | ERS9194859 | 2018 | 99948  | 98.5 | 392 | male | MSM    | fosfomycin | Pharynx | Locations-pair + times-pair | UNKN03 | 8156  | 442  |
| P28 | NG_AMS0454   | ERS9194860 | 2018 | 101904 | 98.7 | 871 | male | MSM    | ceftriaxon | Urethra | Locations-pair              | 5441   | 8156  | 442  |
| P28 | NG_AMS0455   | ERS9194861 | 2018 | 101905 | 98.9 | 515 | male | MSM    | ceftriaxon | Proctum | Locations-pair              | 2992   | 11428 | 63   |
| P29 | NG_AMS0456   | ERS9194862 | 2018 | 99936  | 98.8 | 392 | male | MSM    | fosfomycin | Urethra | Times-pair                  | 5985   | 12462 | 42   |
| P29 | NG_AMS0458   | ERS9194863 | 2018 | 99937  | 98.8 | 297 | male | MSM    | fosfomycin | Urethra | Times-pair                  | 5985   | 12462 | 42   |
| P30 | NG_AMS0459   | ERS9194864 | 2018 | 99964  | 98.9 | 503 | male | MSM    | fosfomycin | Proctum | Locations-pair + times-pair | 13893  | 13956 | 1295 |
| P30 | NG_AMS0462   | ERS9194866 | 2018 | 99966  | 98.9 | 541 | male | MSM    | fosfomycin | Proctum | Locations-pair + times-pair | 13893  | 13956 | 1295 |
| P30 | NG_AMS0464   | ERS9194868 | 2018 | 99968  | 98.9 | 466 | male | MSM    | fosfomycin | Proctum | Times-pair                  | 13893  | 13956 | 1295 |
| P30 | NG_AMS0460   | ERS9194865 | 2018 | 99965  | 98.9 | 422 | male | MSM    | fosfomycin | Pharynx | Locations-pair + times-pair | 13893  | 13956 | 1295 |
| P30 | NG_AMS0463   | ERS9194867 | 2018 | 99967  | 98.9 | 474 | male | MSM    | fosfomycin | Pharynx | Locations-pair + times-pair | 13893  | 13956 | 1295 |
| P31 | NG_AMS0465   | ERS9194869 | 2018 | 100003 | 99.2 | 462 | male | MSM    | fosfomycin | Proctum | Times-pair                  | NEW2   | 11516 | 55   |
| P31 | NG_AMS0467   | ERS9194871 | 2018 | 100004 | 99.2 | 534 | male | MSM    | fosfomycin | Proctum | Times-pair                  | NEW2   | 11516 | 55   |
| P31 | NG_AMS0471   | ERS9194875 | 2018 | 99950  | 99.2 | 489 | male | MSM    | fosfomycin | Proctum | Times-pair                  | NEW2   | 11516 | 55   |
| P32 | NG_AMS0185_2 | ERS9194784 | 2018 | 99982  | 98.6 | 570 | male | MSM    | gentamycin | Proctum | Locations-pair              | 2318   | 7827  | 38   |
| P32 | NG_AMS0184_2 | ERS9194783 | 2018 | 99981  | 98.6 | 492 | male | MSM    | gentamycin | Urethra | Locations-pair              | 2318   | 7827  | 38   |
| P33 | NG_AMS0466   | ERS9194870 | 2018 | 99898  | 98.6 | 552 | male | hetero | fosfomycin | Urethra | Times-pair                  | 2678   | 8135  | 729  |
| P33 | NG_AMS0468   | ERS9194872 | 2018 | 99899  | 98.6 | 540 | male | hetero | fosfomycin | Urethra | Times-pair                  | 2678   | 8135  | 729  |
| P34 | NG_AMS0470   | ERS9194874 | 2018 | 101907 | 98.6 | 532 | male | MSM    | ertapenem  | Proctum | Locations-pair              | 19178  | 10314 | 2730 |
| P34 | NG_AMS0469   | ERS9194873 | 2018 | 101906 | 98.6 | 526 | male | MSM    | ertapenem  | Urethra | Times-pair                  | 19178  | 10314 | 2730 |

|     |              |            |      |        |      |     |      |     |            |         |                                |       |       |      |
|-----|--------------|------------|------|--------|------|-----|------|-----|------------|---------|--------------------------------|-------|-------|------|
| P34 | NG_AMS0191_2 | ERS9194785 | 2018 | 101908 | 98.6 | 541 | male | MSM | ertapenem  | Urethra | Locations-pair +<br>times-pair | 19178 | 10314 | 2730 |
| P35 | NG_AMS0472   | ERS9194876 | 2018 | 99930  | 98.6 | 471 | male | MSM | fosfomicin | Urethra | Times-pair                     | 387   | 11993 | NEW1 |
| P35 | NG_AMS0474   | ERS9194877 | 2018 | 99931  | 98.6 | 513 | male | MSM | fosfomicin | Urethra | Times-pair                     | 387   | 11993 | NEW1 |
| P36 | NG_AMS0475   | ERS9194878 | 2018 | 99983  | 98.8 | 510 | male | MSM | fosfomicin | Proctum | Locations-pair +<br>times-pair | 15589 | 1583  | 3310 |
| P36 | NG_AMS0206_2 | ERS9194786 | 2018 | 99932  | 98.8 | 518 | male | MSM | fosfomicin | Proctum | Times-pair                     | 15589 | 1583  | 3310 |
| P36 | NG_AMS0479   | ERS9194882 | 2018 | 99985  | 98.9 | 553 | male | MSM | fosfomicin | Proctum | Times-pair                     | 15589 | 1583  | 3310 |
| P36 | NG_AMS0476   | ERS9194879 | 2018 | 99984  | 98.8 | 466 | male | MSM | fosfomicin | Urethra | Locations-pair                 | 15589 | 1583  | 3310 |
| P37 | NG_AMS0477   | ERS9194880 | 2018 | 99969  | 98.8 | 481 | male | MSM | fosfomicin | Proctum | Times-pair                     | 13489 | 13734 | 3171 |
| P37 | NG_AMS0482   | ERS9194885 | 2018 | 99970  | 98.8 | 434 | male | MSM | fosfomicin | Proctum | Times-pair                     | 13489 | 13734 | 3171 |
| P37 | NG_AMS0486   | ERS9194889 | 2018 | 99971  | 98.8 | 536 | male | MSM | fosfomicin | Proctum | Times-pair                     | 13489 | 13734 | 3171 |
| P38 | NG_AMS0478   | ERS9194881 | 2018 | 100002 | 98.6 | 491 | male | MSM | fosfomicin | Proctum | Times-pair                     | 14700 | 13489 | 1225 |
| P38 | NG_AMS0485   | ERS9194888 | 2018 | 100017 | 98.6 | 426 | male | MSM | fosfomicin | Proctum | Times-pair                     | 14700 | 13489 | 1225 |
| P38 | NG_AMS0491   | ERS9194893 | 2018 | 100018 | 98.6 | 467 | male | MSM | fosfomicin | Proctum | Times-pair                     | 14700 | 13489 | 1225 |
| P39 | NG_AMS0481   | ERS9194884 | 2018 | 99911  | 98.8 | 440 | male | MSM | fosfomicin | Proctum | Locations-pair +<br>times-pair | 15589 | 1583  | 1340 |
| P39 | NG_AMS0489   | ERS9194891 | 2018 | 99912  | 98.9 | 349 | male | MSM | fosfomicin | Proctum | Locations-pair +<br>times-pair | 15589 | 1583  | 1340 |
| P39 | NG_AMS0495   | ERS9194897 | 2018 | 99946  | 98.9 | 309 | male | MSM | fosfomicin | Proctum | Times-pair                     | 15589 | 1583  | 1340 |
| P39 | NG_AMS0480   | ERS9194883 | 2018 | 99910  | 98.7 | 400 | male | MSM | fosfomicin | Pharynx | Locations-pair +<br>times-pair | 15589 | 1583  | 1340 |
| P39 | NG_AMS0490   | ERS9194892 | 2018 | 99997  | 98.7 | 383 | male | MSM | fosfomicin | Pharynx | Locations-pair +<br>times-pair | 15589 | 1583  | 1340 |
| P40 | NG_AMS0484   | ERS9194887 | 2018 | 100008 | 98.5 | 435 | male | MSM | ertapenem  | Proctum | Locations-pair                 | 14994 | 7822  | 1387 |
| P40 | NG_AMS0483   | ERS9194886 | 2018 | 100021 | 98.6 | 475 | male | MSM | ertapenem  | Urethra | Locations-pair                 | 14994 | 7822  | 1387 |
| P41 | NG_AMS0487   | ERS9194890 | 2018 | 99962  | 98.2 | 296 | male | MSM | fosfomicin | Proctum | Times-pair                     | 18147 | 1599  | 3074 |
| P41 | NG_AMS0493   | ERS9194895 | 2018 | 99922  | 98.2 | 354 | male | MSM | fosfomicin | Proctum | Times-pair                     | 18147 | 1599  | 3074 |
| P41 | NG_AMS0494   | ERS9194896 | 2018 | 99963  | 98.2 | 389 | male | MSM | fosfomicin | Proctum | Times-pair                     | 18147 | 1599  | 3074 |
| P42 | NG_AMS0492   | ERS9194894 | 2018 | 99991  | 98.7 | 378 | male | MSM | fosfomicin | Proctum | Times-pair                     | 5441  | 8156  | 442  |
| P42 | NG_AMS0496   | ERS9194898 | 2018 | 100015 | 98.7 | 338 | male | MSM | fosfomicin | Proctum | Times-pair                     | 5441  | 8156  | 442  |
| P42 | NG_AMS0499   | ERS9194901 | 2018 | 99992  | 98.7 | 356 | male | MSM | fosfomicin | Proctum | Times-pair                     | 5441  | 8156  | 442  |
| P43 | NG_AMS0497   | ERS9194899 | 2018 | 100081 | 98.8 | 389 | male | MSM | ertapenem  | Proctum | Locations-pair                 | 18797 | 9363  | 1039 |
| P43 | NG_AMS0498   | ERS9194900 | 2018 | 100082 | 98.8 | 399 | male | MSM | ertapenem  | Pharynx | Locations-pair                 | 18797 | 9363  | 1039 |
| P44 | NG_AMS0500   | ERS9194902 | 2018 | 100028 | 98.6 | 376 | male | MSM | fosfomicin | Proctum | Times-pair                     | 19188 | 10314 | 1387 |
| P44 | NG_AMS0221_2 | ERS9194788 | 2018 | 100010 | 98.6 | 336 | male | MSM | fosfomicin | Proctum | Times-pair                     | 19188 | 10314 | 1387 |
| P45 | NG_AMS0502   | ERS9194903 | 2018 | 99957  | 98.7 | 395 | male | MSM | fosfomicin | Proctum | Locations-pair +<br>times-pair | 5441  | 8156  | 442  |

|     |              |            |      |        |      |     |      |     |            |         |                                |        |       |        |
|-----|--------------|------------|------|--------|------|-----|------|-----|------------|---------|--------------------------------|--------|-------|--------|
| P45 | NG_AMS0504   | ERS9194905 | 2018 | 99958  | 98.7 | 445 | male | MSM | fosfomycin | Proctum | Locations-pair +<br>times-pair | 5441   | 8156  | 442    |
| P45 | NG_AMS0220_2 | ERS9194787 | 2018 | 99955  | 98.6 | 305 | male | MSM | fosfomycin | Pharynx | Locations-pair +<br>times-pair | 10386  | 7827  | 38     |
| P45 | NG_AMS0223_2 | ERS9194789 | 2018 | 99956  | 98.6 | 369 | male | MSM | fosfomycin | Pharynx | Locations-pair +<br>times-pair | 10386  | 7827  | 38     |
| P46 | NG_AMS0503   | ERS9194904 | 2018 | 99933  | 98.5 | 370 | male | MSM | gentamycin | Urethra | Times-pair                     | 5441   | 8156  | 442    |
| P46 | NG_AMS0505   | ERS9194906 | 2018 | 99934  | 98.5 | 442 | male | MSM | gentamycin | Urethra | Times-pair                     | 5441   | 8156  | 442    |
| P46 | NG_AMS0507   | ERS9194908 | 2018 | 100029 | 98.5 | 379 | male | MSM | gentamycin | Urethra | Times-pair                     | 5441   | 8156  | 442    |
| P47 | NG_AMS0506   | ERS9194907 | 2018 | 100052 | 98.8 | 302 | male | MSM | fosfomycin | Proctum | Times-pair                     | 19665  | 14399 | UNKN04 |
| P47 | NG_AMS0510   | ERS9194911 | 2018 | 100057 | 98.8 | 348 | male | MSM | fosfomycin | Proctum | Times-pair                     | 19665  | 14399 | UNKN04 |
| P48 | NG_AMS0508   | ERS9194909 | 2018 | 100005 | 98.6 | 365 | male | MSM | ceftriaxon | Proctum | Locations-pair                 | 14700  | 13489 | 1225   |
| P48 | NG_AMS0509   | ERS9194910 | 2018 | 100020 | 98.6 | 400 | male | MSM | ceftriaxon | Pharynx | Locations-pair                 | 14700  | 13489 | 1225   |
| P49 | NG_AMS0512   | ERS9194913 | 2018 | 100078 | 98.7 | 372 | male | bi  | ceftriaxon | Pharynx | Locations-pair                 | 17495  | 9363  | 1964   |
| P49 | NG_AMS0511   | ERS9194912 | 2018 | 100077 | 98.7 | 319 | male | bi  | ceftriaxon | Urethra | Locations-pair                 | 17495  | 9363  | 1964   |
| P50 | NG_AMS0514   | ERS9194915 | 2018 | 99894  | 98.5 | 279 | male | MSM | ertapenem  | Proctum | Locations-pair                 | 5268   | 10317 | 178    |
| P50 | NG_AMS0513   | ERS9194914 | 2018 | 99897  | 98.5 | 344 | male | MSM | ertapenem  | Pharynx | Locations-pair                 | 5268   | 10317 | 178    |
| P51 | NG_AMS0516   | ERS9194917 | 2018 | 100055 | 98.9 | 336 | male | MSM | gentamycin | Pharynx | Times-pair                     | 12302  | 9363  | 168    |
| P51 | NG_AMS0519   | ERS9194920 | 2018 | 100063 | 98.8 | 271 | male | MSM | gentamycin | Pharynx | Times-pair                     | 12302  | 9363  | 168    |
| P51 | NG_AMS0515   | ERS9194916 | 2018 | 100050 | 98.9 | 427 | male | MSM | gentamycin | Urethra | Times-pair                     | 12302  | 9363  | 168    |
| P52 | NG_AMS0518   | ERS9194919 | 2018 | 99980  | 98.6 | 331 | male | MSM | ertapenem  | Pharynx | Locations-pair                 | 12547  | 7822  | 1387   |
| P52 | NG_AMS0517   | ERS9194918 | 2018 | 100027 | 98.6 | 397 | male | MSM | ertapenem  | Urethra | Locations-pair                 | 12547  | 7822  | 1387   |
| P53 | NG_AMS0521   | ERS9194922 | 2018 | 100006 | 98.6 | 381 | male | MSM | ceftriaxon | Proctum | Locations-pair                 | 19188  | 10314 | 1387   |
| P53 | NG_AMS0520   | ERS9194921 | 2018 | 99952  | 98.6 | 394 | male | MSM | ceftriaxon | Pharynx | Locations-pair                 | 19188  | 10314 | 1387   |
| P54 | NG_AMS0522   | ERS9194923 | 2018 | 99918  | 98.5 | 382 | male | bi  | gentamycin | Proctum | Locations-pair                 | 13484  | 1599  | 2152   |
| P54 | NG_AMS0245_2 | ERS9194790 | 2018 | 99951  | 98.5 | 330 | male | bi  | gentamycin | Pharynx | Locations-pair +<br>times-pair | 13484  | 1599  | 2152   |
| P54 | NG_AMS0523   | ERS9194924 | 2018 | 99902  | 98.5 | 333 | male | bi  | gentamycin | Pharynx | Locations-pair +<br>times-pair | 13484  | 1599  | 2152   |
| P54 | NG_AMS0524   | ERS9194925 | 2018 | 101909 | 98.5 | 472 | male | bi  | gentamycin | Pharynx | Locations-pair +<br>times-pair | 13484  | 1599  | 2152   |
| P54 | NG_AMS0527   | ERS9194928 | 2019 | 101910 | 98.5 | 529 | male | bi  | gentamycin | Pharynx | Locations-pair +<br>times-pair | 13484  | 1599  | 2152   |
| P55 | NG_AMS0526   | ERS9194927 | 2019 | 100061 | 98.9 | 323 | male | MSM | ertapenem  | Proctum | Locations-pair                 | 3935   | 11422 | 193    |
| P55 | NG_AMS0525   | ERS9194926 | 2019 | 100060 | 98.9 | 358 | male | MSM | ertapenem  | Urethra | Locations-pair                 | 3935   | 11422 | 193    |
| P56 | NG_AMS0528   | ERS9194929 | 2019 | 101911 | 98.6 | 589 | male | MSM | gentamycin | Urethra | Times-pair                     | UNKN04 | 7827  | 175    |
| P56 | NG_AMS0529   | ERS9194930 | 2019 | 101912 | 98.6 | 639 | male | MSM | gentamycin | Urethra | Times-pair                     | UNKN04 | 7827  | 175    |
| P57 | NG_AMS0531   | ERS9194932 | 2019 | 100042 | 98.9 | 503 | male | MSM | gentamycin | Pharynx | Locations-pair                 | 2992   | 9362  | 63     |
| P57 | NG_AMS0530   | ERS9194931 | 2019 | 100023 | 98.9 | 305 | male | MSM | gentamycin | Urethra | Locations-pair                 | 2992   | 9362  | 63     |

|     |            |            |      |        |      |      |        |        |            |         |                                |        |        |      |
|-----|------------|------------|------|--------|------|------|--------|--------|------------|---------|--------------------------------|--------|--------|------|
| P58 | NG_AMS0532 | ERS9194933 | 2019 | 99900  | 99.1 | 1079 | female | hetero | ertapenem  | Proctum | Locations-pair                 | 860    | 1893   | 1576 |
| P58 | NG_AMS0533 | ERS9194934 | 2019 | 99908  | 99.1 | 294  | female | hetero | ertapenem  | Vagina  | Locations-pair                 | 860    | 1893   | 1576 |
| P59 | NG_AMS0534 | ERS9194935 | 2019 | 99935  | 99   | 283  | male   | MSM    | ceftriaxon | Proctum | Locations-pair                 | NEW3   | 1583   | 2875 |
| P59 | NG_AMS0535 | ERS9194936 | 2019 | 99987  | 98.5 | 391  | male   | MSM    | ceftriaxon | Urethra | Locations-pair                 | 11461  | UNKN01 | 520  |
| P60 | NG_AMS0536 | ERS9194937 | 2019 | 99940  | 98.3 | 398  | male   | MSM    | gentamycin | Proctum | Locations-pair                 | 16039  | 8156   | 442  |
| P60 | NG_AMS0537 | ERS9194938 | 2019 | 99941  | 98.3 | 380  | male   | MSM    | gentamycin | Urethra | Locations-pair                 | 16039  | 8156   | 442  |
| P61 | NG_AMS0538 | ERS9194939 | 2019 | 99993  | 98.6 | 356  | male   | MSM    | ertapenem  | Urethra | Locations-pair                 | 19188  | 10314  | 1387 |
| P61 | NG_AMS0539 | ERS9194940 | 2019 | 99994  | 98.6 | 385  | male   | MSM    | ertapenem  | Proctum | Locations-pair                 | NEW4   | 10314  | 1387 |
| P62 | NG_AMS0541 | ERS9194942 | 2019 | 100034 | 98.4 | 229  | male   | MSM    | gentamycin | Pharynx | Locations-pair                 | 14994  | 7822   | 1387 |
| P62 | NG_AMS0540 | ERS9194941 | 2019 | 100014 | 98.6 | 388  | male   | MSM    | gentamycin | Urethra | Locations-pair                 | 14994  | 7822   | 1387 |
| P63 | NG_AMS0543 | ERS9194944 | 2019 | 99919  | 98.5 | 352  | male   | MSM    | ertapenem  | Proctum | Locations-pair                 | 11461  | 1599   | 520  |
| P63 | NG_AMS0544 | ERS9194945 | 2019 | 99953  | 98.5 | 394  | male   | MSM    | ertapenem  | Pharynx | Locations-pair                 | 11461  | 1599   | 520  |
| P63 | NG_AMS0542 | ERS9194943 | 2019 | 99905  | 98.5 | 363  | male   | MSM    | ertapenem  | Urethra | Locations-pair                 | 11461  | 1599   | 520  |
| P64 | NG_AMS0545 | ERS9194946 | 2019 | 101913 | 98.6 | 479  | male   | MSM    | gentamycin | Urethra | Locations-pair                 | 19188  | 10314  | 1387 |
| P64 | NG_AMS0546 | ERS9194947 | 2019 | 101914 | 99   | 546  | male   | MSM    | gentamycin | Proctum | Locations-pair                 | UNKN08 | 7363   | 719  |
| P65 | NG_AMS0548 | ERS9194949 | 2019 | 100079 | 98.7 | 363  | male   | MSM    | ceftriaxon | Proctum | Locations-pair                 | NEW5   | 1901   | 128  |
| P65 | NG_AMS0547 | ERS9194948 | 2019 | 100080 | 98.7 | 372  | male   | MSM    | ceftriaxon | Pharynx | Locations-pair                 | NEW5   | 1901   | 128  |
| P66 | NG_AMS0549 | ERS9194950 | 2019 | 100053 | 98.5 | 330  | male   | MSM    | ertapenem  | Proctum | Locations-pair                 | 17972  | 11706  | 1869 |
| P66 | NG_AMS0550 | ERS9194951 | 2019 | 101915 | 98.5 | 365  | male   | MSM    | ertapenem  | Urethra | Locations-pair                 | 17972  | 11706  | 1869 |
| P67 | NG_AMS0552 | ERS9194953 | 2019 | 100043 | 98.4 | 373  | male   | MSM    | ceftriaxon | Proctum | Locations-pair                 | 16928  | 8156   | 442  |
| P67 | NG_AMS0551 | ERS9194952 | 2019 | 99976  | 98.4 | 328  | male   | MSM    | ceftriaxon | Urethra | Locations-pair                 | 16928  | 8156   | 442  |
| P68 | NG_AMS0553 | ERS9194954 | 2019 | 101916 | 98.6 | 549  | male   | MSM    | gentamycin | Urethra | Times-pair                     | 14994  | 7822   | 1387 |
| P68 | NG_AMS0554 | ERS9194955 | 2019 | 101917 | 98.6 | 561  | male   | MSM    | gentamycin | Urethra | Times-pair                     | 14994  | 7822   | 1387 |
| P69 | NG_AMS0555 | ERS9194956 | 2019 | 99906  | 98.5 | 324  | male   | MSM    | gentamycin | Proctum | Locations-pair                 | 16001  | 1583   | NEW2 |
| P69 | NG_AMS0559 | ERS9194960 | 2019 | 101918 | 98.5 | 444  | male   | MSM    | gentamycin | Pharynx | Times-pair                     | 16001  | 1583   | NEW2 |
| P69 | NG_AMS0556 | ERS9194957 | 2019 | 99907  | 98.5 | 323  | male   | MSM    | gentamycin | Pharynx | Locations-pair +<br>times-pair | UNKN05 | 1583   | NEW2 |
| P70 | NG_AMS0557 | ERS9194958 | 2019 | 99926  | 98.5 | 415  | male   | MSM    | ertapenem  | Proctum | Locations-pair                 | 17972  | 11706  | 1869 |
| P70 | NG_AMS0558 | ERS9194959 | 2019 | 99927  | 98.4 | 379  | male   | MSM    | ertapenem  | Pharynx | Locations-pair                 | 17972  | 11706  | 1869 |
| P71 | NG_AMS0561 | ERS9194962 | 2019 | 100036 | 98.5 | 392  | male   | MSM    | ceftriaxon | Proctum | Locations-pair                 | 17972  | 11706  | 1869 |
| P71 | NG_AMS0560 | ERS9194961 | 2019 | 99942  | 98.4 | 377  | male   | MSM    | ceftriaxon | Urethra | Locations-pair                 | UNKN06 | 11706  | 1869 |
| P72 | NG_AMS0562 | ERS9194963 | 2019 | 100019 | 98.6 | 328  | male   | MSM    | gentamycin | Proctum | Locations-pair                 | 14994  | 7822   | 1387 |
| P72 | NG_AMS0563 | ERS9194964 | 2019 | 100046 | 98.6 | 363  | male   | MSM    | gentamycin | Pharynx | Locations-pair                 | 14994  | 7822   | 1387 |
| P73 | NG_AMS0564 | ERS9194965 | 2019 | 100041 | 98.5 | 370  | male   | MSM    | ceftriaxon | Proctum | Locations-pair                 | 19559  | 7822   | 1615 |
| P73 | NG_AMS0565 | ERS9194966 | 2019 | 100022 | 98.5 | 362  | male   | MSM    | ceftriaxon | Pharynx | Locations-pair                 | 19559  | 7822   | 1615 |
| P74 | NG_AMS0568 | ERS9194968 | 2019 | 99988  | 98.4 | 371  | male   | MSM    | gentamycin | Proctum | Locations-pair                 | 17972  | 11706  | 1869 |
| P74 | NG_AMS0567 | ERS9194967 | 2019 | 100033 | 98   | 63   | male   | MSM    | gentamycin | Urethra | Locations-pair                 | 17972  | 11706  | 1869 |
| P75 | NG_AMS0569 | ERS9194969 | 2019 | 101920 | 98.8 | 472  | male   | MSM    | gentamycin | Proctum | Times-pair                     | 19275  | 9363   | 3194 |



|     |            |            |      |        |      |     |        |        |            |         |                                |        |       |      |
|-----|------------|------------|------|--------|------|-----|--------|--------|------------|---------|--------------------------------|--------|-------|------|
| P75 | NG_AMS0571 | ERS9194971 | 2019 | 100084 | 98.9 | 382 | male   | MSM    | gentamycin | Proctum | Locations-pair +<br>times-pair | 19275  | 9363  | 3194 |
| P75 | NG_AMS0572 | ERS9194972 | 2019 | 100085 | 98.9 | 378 | male   | MSM    | gentamycin | Proctum | Times-pair                     | 19275  | 9363  | 3194 |
| P75 | NG_AMS0570 | ERS9194970 | 2019 | 100083 | 98.8 | 314 | male   | MSM    | gentamycin | Pharynx | Locations-pair                 | 19275  | 9363  | 3194 |
| P76 | NG_AMS0574 | ERS9194974 | 2020 | 100049 | 98.8 | 334 | male   | MSM    | ceftriaxon | Proctum | Locations-pair                 | NEW6   | 9363  | 168  |
| P76 | NG_AMS0573 | ERS9194973 | 2020 | 100048 | 98.8 | 394 | male   | MSM    | ceftriaxon | Pharynx | Locations-pair                 | NEW6   | 9363  | 168  |
| P77 | NG_AMS0576 | ERS9194976 | 2020 | 100054 | 98.4 | 352 | male   | MSM    | ertapenem  | Urethra | Locations-pair                 | NEW9   | 11706 | 1869 |
| P77 | NG_AMS0575 | ERS9194975 | 2020 | 100035 | 98.5 | 361 | male   | MSM    | ertapenem  | Proctum | Locations-pair                 | 12547  | 10314 | 1387 |
| P78 | NG_AMS0579 | ERS9194979 | 2020 | 100000 | 98.5 | 376 | female | hetero | gentamycin | Cervix  | Locations-pair                 | UNKN07 | 8156  | 442  |
| P78 | NG_AMS0578 | ERS9194978 | 2020 | 99999  | 98.5 | 351 | female | hetero | gentamycin | Proctum | Locations-pair                 | UNKN07 | 8156  | 442  |
| P78 | NG_AMS0577 | ERS9194977 | 2020 | 99998  | 98.5 | 310 | female | hetero | gentamycin | Pharynx | Locations-pair                 | UNKN07 | 8156  | 442  |
| P79 | NG_AMS0581 | ERS9194981 | 2020 | 100059 | 98.9 | 300 | male   | MSM    | ceftriaxon | Proctum | Locations-pair                 | NEW7   | 9362  | 1660 |
| P79 | NG_AMS0580 | ERS9194980 | 2020 | 100058 | 98.9 | 274 | male   | MSM    | ceftriaxon | Urethra | Locations-pair                 | NEW7   | 9362  | 1660 |
| P80 | NG_AMS0583 | ERS9194983 | 2020 | 100025 | 98.5 | 342 | male   | MSM    | ertapenem  | Proctum | Locations-pair                 | 3674   | 8156  | 442  |
| P80 | NG_AMS0582 | ERS9194982 | 2020 | 100024 | 98.5 | 313 | male   | MSM    | ertapenem  | Pharynx | Locations-pair                 | 3674   | 8156  | 442  |

**Table S2. Characteristics of all within-host isolate pairs and the differences found on the levels of sequence types, cgMLST alleles and SNPs.**

| Isolate1   | Isolate2   | Participant number | Type of pair   | Time-point comparison | MLST_ iso1 | MLST_ iso2 | NGMAST iso1 | NGMAST iso2 | NGSTAR iso1 | NGSTAR iso2 | Sequence type comparison     | cgMLST_allele_dist | cgMLST_cat | Un-filtered SNP distance | Recombination filtered SNP distance |
|------------|------------|--------------------|----------------|-----------------------|------------|------------|-------------|-------------|-------------|-------------|------------------------------|--------------------|------------|--------------------------|-------------------------------------|
| NG_AMS0386 | NG_AMS0388 | P01                | Times-pair     | t2t3                  | 10314      | 10314      | 12547       | 12547       | 1387        | 1387        | same MLST+<br>NGSTAR+ NGMAST | 0                  | <15        | 7                        | 1                                   |
| NG_AMS0382 | NG_AMS0386 | P01                | Times-pair     | t1t2                  | 10314      | 10314      | 12547       | 12547       | 1387        | 1387        | same MLST+<br>NGSTAR+ NGMAST | 0                  | <15        | 7                        | 0                                   |
| NG_AMS0383 | NG_AMS0384 | P02                | Locations-pair |                       | 8122       | 8122       | 292         | 292         | 299         | 299         | same MLST+<br>NGSTAR+ NGMAST | 0                  | <15        | 20                       | 1                                   |
| NG_AMS0384 | NG_AMS0385 | P02                | Times-pair     | t1t2                  | 8122       | 8122       | 292         | 292         | 299         | 299         | same MLST+<br>NGSTAR+ NGMAST | 0                  | <15        | 21                       | 2                                   |
| NG_AMS0396 | NG_AMS0399 | P03                | Times-pair     | t2t3                  | 9363       | 9363       | 12302       | 12302       | UNKN01      | UNKN01      | same MLST+<br>NGSTAR+ NGMAST | 0                  | <15        | 6                        | 1                                   |
| NG_AMS0389 | NG_AMS0396 | P03                | Times-pair     | t1t2                  | 9363       | 9363       | 12302       | 12302       | UNKN01      | UNKN01      | same MLST+<br>NGSTAR+ NGMAST | 0                  | <15        | 7                        | 1                                   |
| NG_AMS0390 | NG_AMS0391 | P04                | Locations-pair |                       | 9363       | 9363       | 17459       | 17459       | 301         | 301         | same MLST+<br>NGSTAR+ NGMAST | 0                  | <15        | 9                        | 1                                   |
| NG_AMS0392 | NG_AMS0393 | P05                | Locations-pair |                       | 8156       | 8156       | 5441        | 5441        | 442         | 442         | same MLST+<br>NGSTAR+ NGMAST | 0                  | <15        | 9                        | 1                                   |
| NG_AMS0393 | NG_AMS0401 | P05                | Times-pair     | t1t2                  | 8156       | 8156       | 5441        | 13784       | 442         | 442         | different NGMAST             | 1                  | <15        | 16                       | 3                                   |
| NG_AMS0394 | NG_AMS0395 | P06                | Locations-pair |                       | 8156       | 8156       | 5441        | 5441        | 442         | 442         | same MLST+<br>NGSTAR+ NGMAST | 0                  | <15        | 9                        | 0                                   |
| NG_AMS0397 | NG_AMS0398 | P07                | Locations-pair |                       | 12093      | 12093      | 5964        | 5964        | 139         | 139         | same MLST+<br>NGSTAR+ NGMAST | 0                  | <15        | 20                       | 7                                   |
| NG_AMS0402 | NG_AMS0403 | P08                | Locations-pair |                       | 9363       | 9363       | NEW1        | 12302       | 168         | 168         | different NGMAST             | 2                  | <15        | 7                        | 2                                   |
| NG_AMS0409 | NG_AMS0410 | P08                | Locations-pair |                       | 9363       | 9363       | NEW1        | 12302       | 168         | 168         | different NGMAST             | 2                  | <15        | 10                       | 1                                   |
| NG_AMS0403 | NG_AMS0410 | P08                | Times-pair     | t2t3                  | 9363       | 9363       | 12302       | 12302       | 168         | 168         | same MLST+<br>NGSTAR+ NGMAST | 1                  | <15        | 4                        | 2                                   |
| NG_AMS0400 | NG_AMS0403 | P08                | Times-pair     | t1t2                  | 9363       | 9363       | 12302       | 12302       | 168         | 168         | same MLST+<br>NGSTAR+ NGMAST | 1                  | <15        | 7                        | 3                                   |
| NG_AMS0402 | NG_AMS0409 | P08                | Times-pair     | t2t3                  | 9363       | 9363       | NEW1        | NEW1        | 168         | 168         | same MLST+<br>NGSTAR+ NGMAST | 1                  | <15        | 9                        | 3                                   |
| NG_AMS0404 | NG_AMS0413 | P09                | Times-pair     | t1t2                  | 7822       | 7822       | 14994       | 14994       | 1387        | 1387        | same MLST+<br>NGSTAR+ NGMAST | 0                  | <15        | 10                       | 0                                   |

|            |            |     |                |      |       |       |        |        |        |        |                                   |     |     |      |      |
|------------|------------|-----|----------------|------|-------|-------|--------|--------|--------|--------|-----------------------------------|-----|-----|------|------|
| NG_AMS0405 | NG_AMS0406 | P10 | Locations-pair |      | 7827  | 7827  | 10386  | 10386  | 38     | 38     | same MLST+<br>NGSTAR+ NGMAST      | 0   | <15 | 2    | 0    |
| NG_AMS0406 | NG_AMS0407 | P10 | Locations-pair |      | 7827  | 10314 | 10386  | 16020  | 38     | UNKN02 | different MLST+<br>NGSTAR+ NGMAST | 728 | >15 | 4805 | 1466 |
| NG_AMS0405 | NG_AMS0407 | P10 | Locations-pair |      | 7827  | 10314 | 10386  | 16020  | 38     | UNKN02 | different MLST+<br>NGSTAR+ NGMAST | 729 | >15 | 4807 | 1464 |
| NG_AMS0408 | NG_AMS0414 | P11 | Times-pair     | t1t2 | 9363  | 9363  | 12302  | 12302  | 168    | 168    | same MLST+<br>NGSTAR+ NGMAST      | 0   | <15 | 2    | 0    |
| NG_AMS0417 | NG_AMS0418 | P12 | Locations-pair |      | 1599  | 1599  | 11461  | 11461  | 520    | 520    | same MLST+<br>NGSTAR+ NGMAST      | 0   | <15 | 4    | 2    |
| NG_AMS0411 | NG_AMS0412 | P12 | Locations-pair |      | 1599  | 1599  | 11461  | 11461  | 520    | 520    | same MLST+<br>NGSTAR+ NGMAST      | 0   | <15 | 13   | 3    |
| NG_AMS0412 | NG_AMS0417 | P12 | Times-pair     | t1t2 | 1599  | 1599  | 11461  | 11461  | 520    | 520    | same MLST+<br>NGSTAR+ NGMAST      | 0   | <15 | 6    | 1    |
| NG_AMS0411 | NG_AMS0418 | P12 | Times-pair     | t1t2 | 1599  | 1599  | 11461  | 11461  | 520    | 520    | same MLST+<br>NGSTAR+ NGMAST      | 0   | <15 | 12   | 1    |
| NG_AMS0415 | NG_AMS0416 | P13 | Locations-pair |      | NEW1  | NEW1  | 9918   | 9918   | 436    | 436    | same MLST+<br>NGSTAR+ NGMAST      | 0   | <15 | 4    | 1    |
| NG_AMS0419 | NG_AMS0420 | P14 | Locations-pair |      | 11971 | 10314 | 15058  | 16065  | 2538   | 1615   | different MLST+<br>NGSTAR+ NGMAST | 830 | >15 | 6432 | 1707 |
| NG_AMS0421 | NG_AMS0422 | P15 | Times-pair     | t1t2 | 8145  | 8145  | 13470  | 13470  | 3651   | 3651   | same MLST+<br>NGSTAR+ NGMAST      | 0   | <15 | 18   | 2    |
| NG_AMS0423 | NG_AMS0424 | P16 | Locations-pair |      | 11422 | 11422 | UNKN01 | UNKN01 | 2953   | 2953   | same MLST+<br>NGSTAR+ NGMAST      | 0   | <15 | 3    | 0    |
| NG_AMS0425 | NG_AMS0428 | P17 | Times-pair     | t1t2 | 1599  | 1599  | 11461  | 11461  | 520    | 520    | same MLST+<br>NGSTAR+ NGMAST      | 0   | <15 | 4    | 1    |
| NG_AMS0426 | NG_AMS0427 | P18 | Locations-pair |      | 8143  | 8143  | 5624   | 5624   | 426    | 426    | same MLST+<br>NGSTAR+ NGMAST      | 0   | <15 | 4    | 2    |
| NG_AMS0429 | NG_AMS0431 | P19 | Times-pair     | t1t2 | 11428 | 11428 | NEW8   | NEW8   | 63     | 63     | same MLST+<br>NGSTAR+ NGMAST      | 1   | <15 | 4    | 0    |
| NG_AMS0431 | NG_AMS0433 | P19 | Times-pair     | t2t3 | 11428 | 11428 | NEW8   | NEW8   | 63     | 63     | same MLST+<br>NGSTAR+ NGMAST      | 2   | <15 | 9    | 1    |
| NG_AMS0430 | NG_AMS0432 | P20 | Times-pair     | t1t2 | 7822  | 7822  | 4995   | 4995   | 3321   | 3321   | same MLST+<br>NGSTAR+ NGMAST      | 0   | <15 | 6    | 0    |
| NG_AMS0165 | NG_AMS0166 | P21 | Times-pair     | t2t3 | 1901  | 1901  | 1407   | 1407   | UNKN03 | UNKN03 | same MLST+<br>NGSTAR+ NGMAST      | 1   | <15 | 10   | 1    |
| NG_AMS0165 | NG_AMS0435 | P21 | Times-pair     | t1t2 | 1901  | 1901  | 1407   | 1407   | UNKN03 | UNKN03 | same MLST+<br>NGSTAR+ NGMAST      | 0   | <15 | 12   | 2    |

|            |            |     |                |      |       |       |        |        |      |      |                                   |     |     |      |      |
|------------|------------|-----|----------------|------|-------|-------|--------|--------|------|------|-----------------------------------|-----|-----|------|------|
| NG_AMS0436 | NG_AMS0437 | P22 | Locations-pair |      | 13734 | 9363  | 13489  | 12302  | 3171 | 168  | different MLST+<br>NGSTAR+ NGMAST | 684 | >15 | 5887 | 1054 |
| NG_AMS0437 | NG_AMS0438 | P22 | Times-pair     | t1t2 | 9363  | 9363  | 12302  | 12302  | 168  | 168  | same MLST+<br>NGSTAR+ NGMAST      | 1   | <15 | 4    | 1    |
| NG_AMS0439 | NG_AMS0440 | P23 | Times-pair     | t1t2 | 1580  | 1580  | 1195   | 1195   | 182  | 182  | same MLST+<br>NGSTAR+ NGMAST      | 1   | <15 | 13   | 1    |
| NG_AMS0442 | NG_AMS0447 | P24 | Times-pair     | t1t2 | 9363  | 9363  | 12302  | 12302  | 168  | 168  | same MLST+<br>NGSTAR+ NGMAST      | 1   | <15 | 6    | 2    |
| NG_AMS0441 | NG_AMS0443 | P25 | Times-pair     | t1t2 | 1599  | 1599  | 14764  | 14764  | 520  | 520  | same MLST+<br>NGSTAR+ NGMAST      | 0   | <15 | 6    | 0    |
| NG_AMS0444 | NG_AMS0445 | P26 | Locations-pair |      | 7822  | 7822  | 4995   | 4995   | 3321 | 3321 | same MLST+<br>NGSTAR+ NGMAST      | 1   | <15 | 5    | 1    |
| NG_AMS0444 | NG_AMS0449 | P26 | Times-pair     | t1t2 | 7822  | 7822  | 4995   | 4995   | 3321 | 3321 | same MLST+<br>NGSTAR+ NGMAST      | 1   | <15 | 10   | 3    |
| NG_AMS0452 | NG_AMS0453 | P27 | Locations-pair |      | 8156  | 8156  | UNKN02 | UNKN03 | 442  | 442  | different NGMAST                  | 2   | <15 | 8    | 3    |
| NG_AMS0450 | NG_AMS0451 | P27 | Locations-pair |      | 8156  | 8156  | UNKN03 | UNKN02 | 442  | 442  | different NGMAST                  | 0   | <15 | 9    | 1    |
| NG_AMS0451 | NG_AMS0452 | P27 | Times-pair     | t2t3 | 8156  | 8156  | UNKN02 | UNKN02 | 442  | 442  | same MLST+<br>NGSTAR+ NGMAST      | 0   | <15 | 5    | 0    |
| NG_AMS0446 | NG_AMS0451 | P27 | Times-pair     | t1t2 | 8156  | 8156  | UNKN02 | UNKN02 | 442  | 442  | same MLST+<br>NGSTAR+ NGMAST      | 0   | <15 | 8    | 3    |
| NG_AMS0450 | NG_AMS0453 | P27 | Times-pair     | t1t2 | 8156  | 8156  | UNKN03 | UNKN03 | 442  | 442  | same MLST+<br>NGSTAR+ NGMAST      | 1   | <15 | 18   | 3    |
| NG_AMS0454 | NG_AMS0455 | P28 | Locations-pair |      | 8156  | 11428 | 5441   | 2992   | 442  | 63   | different MLST+<br>NGSTAR+ NGMAST | 673 | >15 | 5101 | 1145 |
| NG_AMS0456 | NG_AMS0458 | P29 | Times-pair     | t1t2 | 12462 | 12462 | 5985   | 5985   | 42   | 42   | same MLST+<br>NGSTAR+ NGMAST      | 0   | <15 | 5    | 0    |
| NG_AMS0462 | NG_AMS0463 | P30 | Locations-pair |      | 13956 | 13956 | 13893  | 13893  | 1295 | 1295 | same MLST+<br>NGSTAR+ NGMAST      | 0   | <15 | 8    | 1    |
| NG_AMS0459 | NG_AMS0460 | P30 | Locations-pair |      | 13956 | 13956 | 13893  | 13893  | 1295 | 1295 | same MLST+<br>NGSTAR+ NGMAST      | 0   | <15 | 11   | 0    |
| NG_AMS0462 | NG_AMS0464 | P30 | Times-pair     | t2t3 | 13956 | 13956 | 13893  | 13893  | 1295 | 1295 | same MLST+<br>NGSTAR+ NGMAST      | 0   | <15 | 7    | 3    |
| NG_AMS0459 | NG_AMS0462 | P30 | Times-pair     | t1t2 | 13956 | 13956 | 13893  | 13893  | 1295 | 1295 | same MLST+<br>NGSTAR+ NGMAST      | 0   | <15 | 9    | 0    |
| NG_AMS0460 | NG_AMS0463 | P30 | Times-pair     | t1t2 | 13956 | 13956 | 13893  | 13893  | 1295 | 1295 | same MLST+<br>NGSTAR+ NGMAST      | 0   | <15 | 11   | 2    |
| NG_AMS0465 | NG_AMS0467 | P31 | Times-pair     | t1t2 | 11516 | 11516 | NEW2   | NEW2   | 55   | 55   | same MLST+<br>NGSTAR+ NGMAST      | 0   | <15 | 3    | 0    |

|            |            |     |                |      |       |       |       |       |      |      |                              |   |     |    |   |
|------------|------------|-----|----------------|------|-------|-------|-------|-------|------|------|------------------------------|---|-----|----|---|
| NG_AMS0467 | NG_AMS0471 | P31 | Times-pair     | t2t3 | 11516 | 11516 | NEW2  | NEW2  | 55   | 55   | same MLST+<br>NGSTAR+ NGMAST | 0 | <15 | 8  | 0 |
| NG_AMS0184 | NG_AMS0185 | P32 | Locations-pair |      | 7827  | 7827  | 2318  | 2318  | 38   | 38   | same MLST+<br>NGSTAR+ NGMAST | 0 | <15 | 2  | 0 |
| NG_AMS0466 | NG_AMS0468 | P33 | Times-pair     | t1t2 | 8135  | 8135  | 2678  | 2678  | 729  | 729  | same MLST+<br>NGSTAR+ NGMAST | 1 | <15 | 5  | 1 |
| NG_AMS0191 | NG_AMS0470 | P34 | Locations-pair |      | 10314 | 10314 | 19178 | 19178 | 2730 | 2730 | same MLST+<br>NGSTAR+ NGMAST | 1 | <15 | 5  | 0 |
| NG_AMS0191 | NG_AMS0469 | P34 | Times-pair     | t1t2 | 10314 | 10314 | 19178 | 19178 | 2730 | 2730 | same MLST+<br>NGSTAR+ NGMAST | 0 | <15 | 9  | 0 |
| NG_AMS0472 | NG_AMS0474 | P35 | Times-pair     | t1t2 | 11993 | 11993 | 387   | 387   | NEW1 | NEW1 | same MLST+<br>NGSTAR+ NGMAST | 0 | <15 | 8  | 1 |
| NG_AMS0475 | NG_AMS0476 | P36 | Locations-pair |      | 1583  | 1583  | 15589 | 15589 | 3310 | 3310 | same MLST+<br>NGSTAR+ NGMAST | 1 | <15 | 4  | 1 |
| NG_AMS0206 | NG_AMS0479 | P36 | Times-pair     | t2t3 | 1583  | 1583  | 15589 | 15589 | 3310 | 3310 | same MLST+<br>NGSTAR+ NGMAST | 0 | <15 | 2  | 1 |
| NG_AMS0206 | NG_AMS0475 | P36 | Times-pair     | t1t2 | 1583  | 1583  | 15589 | 15589 | 3310 | 3310 | same MLST+<br>NGSTAR+ NGMAST | 1 | <15 | 4  | 1 |
| NG_AMS0482 | NG_AMS0486 | P37 | Times-pair     | t2t3 | 13734 | 13734 | 13489 | 13489 | 3171 | 3171 | same MLST+<br>NGSTAR+ NGMAST | 0 | <15 | 5  | 1 |
| NG_AMS0477 | NG_AMS0482 | P37 | Times-pair     | t1t2 | 13734 | 13734 | 13489 | 13489 | 3171 | 3171 | same MLST+<br>NGSTAR+ NGMAST | 1 | <15 | 18 | 2 |
| NG_AMS0478 | NG_AMS0485 | P38 | Times-pair     | t1t2 | 13489 | 13489 | 14700 | 14700 | 1225 | 1225 | same MLST+<br>NGSTAR+ NGMAST | 0 | <15 | 15 | 1 |
| NG_AMS0485 | NG_AMS0491 | P38 | Times-pair     | t2t3 | 13489 | 13489 | 14700 | 14700 | 1225 | 1225 | same MLST+<br>NGSTAR+ NGMAST | 0 | <15 | 18 | 1 |
| NG_AMS0480 | NG_AMS0481 | P39 | Locations-pair |      | 1583  | 1583  | 15589 | 15589 | 1340 | 1340 | same MLST+<br>NGSTAR+ NGMAST | 2 | <15 | 12 | 1 |
| NG_AMS0489 | NG_AMS0490 | P39 | Locations-pair |      | 1583  | 1583  | 15589 | 15589 | 1340 | 1340 | same MLST+<br>NGSTAR+ NGMAST | 8 | <15 | 78 | 4 |
| NG_AMS0481 | NG_AMS0489 | P39 | Times-pair     | t1t2 | 1583  | 1583  | 15589 | 15589 | 1340 | 1340 | same MLST+<br>NGSTAR+ NGMAST | 1 | <15 | 10 | 3 |
| NG_AMS0489 | NG_AMS0495 | P39 | Times-pair     | t2t3 | 1583  | 1583  | 15589 | 15589 | 1340 | 1340 | same MLST+<br>NGSTAR+ NGMAST | 4 | <15 | 74 | 4 |
| NG_AMS0480 | NG_AMS0490 | P39 | Times-pair     | t1t2 | 1583  | 1583  | 15589 | 15589 | 1340 | 1340 | same MLST+<br>NGSTAR+ NGMAST | 7 | <15 | 82 | 3 |
| NG_AMS0483 | NG_AMS0484 | P40 | Locations-pair |      | 7822  | 7822  | 14994 | 14994 | 1387 | 1387 | same MLST+<br>NGSTAR+ NGMAST | 0 | <15 | 11 | 1 |

|            |            |     |                |      |       |       |       |       |        |        |                                   |     |     |      |      |
|------------|------------|-----|----------------|------|-------|-------|-------|-------|--------|--------|-----------------------------------|-----|-----|------|------|
| NG_AMS0493 | NG_AMS0494 | P41 | Times-pair     | t2t3 | 1599  | 1599  | 18147 | 18147 | 3074   | 3074   | same MLST+<br>NGSTAR+ NGMAST      | 0   | <15 | 6    | 0    |
| NG_AMS0487 | NG_AMS0493 | P41 | Times-pair     | t1t2 | 1599  | 1599  | 18147 | 18147 | 3074   | 3074   | same MLST+<br>NGSTAR+ NGMAST      | 1   | <15 | 8    | 0    |
| NG_AMS0492 | NG_AMS0496 | P42 | Times-pair     | t1t2 | 8156  | 8156  | 5441  | 5441  | 442    | 442    | same MLST+<br>NGSTAR+ NGMAST      | 0   | <15 | 9    | 0    |
| NG_AMS0496 | NG_AMS0499 | P42 | Times-pair     | t2t3 | 8156  | 8156  | 5441  | 5441  | 442    | 442    | same MLST+<br>NGSTAR+ NGMAST      | 1   | <15 | 11   | 0    |
| NG_AMS0497 | NG_AMS0498 | P43 | Locations-pair |      | 9363  | 9363  | 18797 | 18797 | 1039   | 1039   | same MLST+<br>NGSTAR+ NGMAST      | 1   | <15 | 4    | 1    |
| NG_AMS0221 | NG_AMS0500 | P44 | Times-pair     | t1t2 | 10314 | 10314 | 19188 | 19188 | 1387   | 1387   | same MLST+<br>NGSTAR+ NGMAST      | 0   | <15 | 5    | 1    |
| NG_AMS0223 | NG_AMS0502 | P45 | Locations-pair |      | 7827  | 8156  | 10386 | 5441  | 38     | 442    | different MLST+<br>NGSTAR+ NGMAST | 736 | >15 | 4616 | 1570 |
| NG_AMS0502 | NG_AMS0504 | P45 | Times-pair     | t1t2 | 8156  | 8156  | 5441  | 5441  | 442    | 442    | same MLST+<br>NGSTAR+ NGMAST      | 1   | <15 | 4    | 0    |
| NG_AMS0220 | NG_AMS0223 | P45 | Times-pair     | t1t2 | 7827  | 7827  | 10386 | 10386 | 38     | 38     | same MLST+<br>NGSTAR+ NGMAST      | 1   | <15 | 1    | 0    |
| NG_AMS0503 | NG_AMS0505 | P46 | Times-pair     | t1t2 | 8156  | 8156  | 5441  | 5441  | 442    | 442    | same MLST+<br>NGSTAR+ NGMAST      | 0   | <15 | 4    | 0    |
| NG_AMS0505 | NG_AMS0507 | P46 | Times-pair     | t2t3 | 8156  | 8156  | 5441  | 5441  | 442    | 442    | same MLST+<br>NGSTAR+ NGMAST      | 0   | <15 | 10   | 1    |
| NG_AMS0506 | NG_AMS0510 | P47 | Times-pair     | t1t2 | 14399 | 14399 | 19665 | 19665 | UNKN04 | UNKN04 | same MLST+<br>NGSTAR+ NGMAST      | 2   | <15 | 6    | 2    |
| NG_AMS0508 | NG_AMS0509 | P48 | Locations-pair |      | 13489 | 13489 | 14700 | 14700 | 1225   | 1225   | same MLST+<br>NGSTAR+ NGMAST      | 0   | <15 | 10   | 1    |
| NG_AMS0511 | NG_AMS0512 | P49 | Locations-pair |      | 9363  | 9363  | 17495 | 17495 | 1964   | 1964   | same MLST+<br>NGSTAR+ NGMAST      | 1   | <15 | 11   | 3    |
| NG_AMS0513 | NG_AMS0514 | P50 | Locations-pair |      | 10317 | 10317 | 5268  | 5268  | 178    | 178    | same MLST+<br>NGSTAR+ NGMAST      | 0   | <15 | 5    | 0    |
| NG_AMS0516 | NG_AMS0519 | P51 | Times-pair     | t1t2 | 9363  | 9363  | 12302 | 12302 | 168    | 168    | same MLST+<br>NGSTAR+ NGMAST      | 4   | <15 | 6    | 2    |
| NG_AMS0517 | NG_AMS0518 | P52 | Locations-pair |      | 7822  | 7822  | 12547 | 12547 | 1387   | 1387   | same MLST+<br>NGSTAR+ NGMAST      | 0   | <15 | 14   | 1    |
| NG_AMS0520 | NG_AMS0521 | P53 | Locations-pair |      | 10314 | 10314 | 19188 | 19188 | 1387   | 1387   | same MLST+<br>NGSTAR+ NGMAST      | 1   | <15 | 4    | 0    |
| NG_AMS0245 | NG_AMS0522 | P54 | Locations-pair |      | 1599  | 1599  | 13484 | 13484 | 2152   | 2152   | same MLST+<br>NGSTAR+ NGMAST      | 1   | <15 | 8    | 2    |

|            |            |     |                |      |       |        |        |        |      |      |                                   |     |     |      |      |
|------------|------------|-----|----------------|------|-------|--------|--------|--------|------|------|-----------------------------------|-----|-----|------|------|
| NG_AMS0524 | NG_AMS0527 | P54 | Times-pair     | t3t4 | 1599  | 1599   | 13484  | 13484  | 2152 | 2152 | same MLST+<br>NGSTAR+ NGMAST      | 0   | <15 | 4    | 1    |
| NG_AMS0245 | NG_AMS0523 | P54 | Times-pair     | t1t2 | 1599  | 1599   | 13484  | 13484  | 2152 | 2152 | same MLST+<br>NGSTAR+ NGMAST      | 1   | <15 | 7    | 2    |
| NG_AMS0523 | NG_AMS0524 | P54 | Times-pair     | t2t3 | 1599  | 1599   | 13484  | 13484  | 2152 | 2152 | same MLST+<br>NGSTAR+ NGMAST      | 0   | <15 | 9    | 1    |
| NG_AMS0525 | NG_AMS0526 | P55 | Locations-pair |      | 11422 | 11422  | 3935   | 3935   | 193  | 193  | same MLST+<br>NGSTAR+ NGMAST      | 0   | <15 | 3    | 1    |
| NG_AMS0528 | NG_AMS0529 | P56 | Times-pair     | t1t2 | 7827  | 7827   | UNKN04 | UNKN04 | 175  | 175  | same MLST+<br>NGSTAR+ NGMAST      | 1   | <15 | 16   | 2    |
| NG_AMS0530 | NG_AMS0531 | P57 | Locations-pair |      | 9362  | 9362   | 2992   | 2992   | 63   | 63   | same MLST+<br>NGSTAR+ NGMAST      | 1   | <15 | 2    | 0    |
| NG_AMS0532 | NG_AMS0533 | P58 | Locations-pair |      | 1893  | 1893   | 860    | 860    | 1576 | 1576 | same MLST+<br>NGSTAR+ NGMAST      | 0   | <15 | 12   | 5    |
| NG_AMS0534 | NG_AMS0535 | P59 | Locations-pair |      | 1583  | UNKN01 | NEW3   | 11461  | 2875 | 520  | different MLST+<br>NGSTAR+ NGMAST | 949 | >15 | 6211 | 2345 |
| NG_AMS0536 | NG_AMS0537 | P60 | Locations-pair |      | 8156  | 8156   | 16039  | 16039  | 442  | 442  | same MLST+<br>NGSTAR+ NGMAST      | 0   | <15 | 3    | 1    |
| NG_AMS0538 | NG_AMS0539 | P61 | Locations-pair |      | 10314 | 10314  | 19188  | NEW4   | 1387 | 1387 | different NGMAST                  | 2   | <15 | 145  | 3    |
| NG_AMS0540 | NG_AMS0541 | P62 | Locations-pair |      | 7822  | 7822   | 14994  | 14994  | 1387 | 1387 | same MLST+<br>NGSTAR+ NGMAST      | 0   | <15 | 9    | 1    |
| NG_AMS0542 | NG_AMS0543 | P63 | Locations-pair |      | 1599  | 1599   | 11461  | 11461  | 520  | 520  | same MLST+<br>NGSTAR+ NGMAST      | 0   | <15 | 3    | 2    |
| NG_AMS0542 | NG_AMS0544 | P63 | Locations-pair |      | 1599  | 1599   | 11461  | 11461  | 520  | 520  | same MLST+<br>NGSTAR+ NGMAST      | 0   | <15 | 3    | 0    |
| NG_AMS0543 | NG_AMS0544 | P63 | Locations-pair |      | 1599  | 1599   | 11461  | 11461  | 520  | 520  | same MLST+<br>NGSTAR+ NGMAST      | 0   | <15 | 5    | 0    |
| NG_AMS0545 | NG_AMS0546 | P64 | Locations-pair |      | 10314 | 7363   | 19188  | UNKN08 | 1387 | 719  | different MLST+<br>NGSTAR+ NGMAST | 775 | >15 | 5419 | 1750 |
| NG_AMS0547 | NG_AMS0548 | P65 | Locations-pair |      | 1901  | 1901   | NEW5   | NEW5   | 128  | 128  | same MLST+<br>NGSTAR+ NGMAST      | 1   | <15 | 9    | 3    |
| NG_AMS0549 | NG_AMS0550 | P66 | Locations-pair |      | 11706 | 11706  | 17972  | 17972  | 1869 | 1869 | same MLST+<br>NGSTAR+ NGMAST      | 15  | <15 | 67   | 6    |
| NG_AMS0551 | NG_AMS0552 | P67 | Locations-pair |      | 8156  | 8156   | 16928  | 16928  | 442  | 442  | same MLST+<br>NGSTAR+ NGMAST      | 0   | <15 | 12   | 2    |
| NG_AMS0553 | NG_AMS0554 | P68 | Times-pair     | t1t2 | 7822  | 7822   | 14994  | 14994  | 1387 | 1387 | same MLST+<br>NGSTAR+ NGMAST      | 0   | <15 | 9    | 0    |
| NG_AMS0555 | NG_AMS0556 | P69 | Locations-pair |      | 1583  | 1583   | 16001  | UNKN05 | NEW2 | NEW2 | different NGMAST                  | 0   | <15 | 5    | 1    |
| NG_AMS0556 | NG_AMS0559 | P69 | Times-pair     | t1t2 | 1583  | 1583   | UNKN05 | 16001  | NEW2 | NEW2 | different NGMAST                  | 1   | <15 | 8    | 0    |

|            |            |     |                |      |       |       |        |        |      |      |                                   |     |     |      |     |
|------------|------------|-----|----------------|------|-------|-------|--------|--------|------|------|-----------------------------------|-----|-----|------|-----|
| NG_AMS0557 | NG_AMS0558 | P70 | Locations-pair |      | 11706 | 11706 | 17972  | 17972  | 1869 | 1869 | same MLST+<br>NGSTAR+ NGMAST      | 2   | <15 | 8    | 0   |
| NG_AMS0560 | NG_AMS0561 | P71 | Locations-pair |      | 11706 | 11706 | UNKN06 | 17972  | 1869 | 1869 | different NGMAST                  | 0   | <15 | 15   | 0   |
| NG_AMS0562 | NG_AMS0563 | P72 | Locations-pair |      | 7822  | 7822  | 14994  | 14994  | 1387 | 1387 | same MLST+<br>NGSTAR+ NGMAST      | 0   | <15 | 6    | 1   |
| NG_AMS0564 | NG_AMS0565 | P73 | Locations-pair |      | 7822  | 7822  | 19559  | 19559  | 1615 | 1615 | same MLST+<br>NGSTAR+ NGMAST      | 0   | <15 | 11   | 0   |
| NG_AMS0567 | NG_AMS0568 | P74 | Locations-pair |      | 11706 | 11706 | 17972  | 17972  | 1869 | 1869 | same MLST+<br>NGSTAR+ NGMAST      | 0   | <15 | 10   | 3   |
| NG_AMS0570 | NG_AMS0571 | P75 | Locations-pair |      | 9363  | 9363  | 19275  | 19275  | 3194 | 3194 | same MLST+<br>NGSTAR+ NGMAST      | 1   | <15 | 12   | 1   |
| NG_AMS0571 | NG_AMS0572 | P75 | Times-pair     | t2t3 | 9363  | 9363  | 19275  | 19275  | 3194 | 3194 | same MLST+<br>NGSTAR+ NGMAST      | 0   | <15 | 4    | 2   |
| NG_AMS0569 | NG_AMS0571 | P75 | Times-pair     | t1t2 | 9363  | 9363  | 19275  | 19275  | 3194 | 3194 | same MLST+<br>NGSTAR+ NGMAST      | 1   | <15 | 6    | 1   |
| NG_AMS0573 | NG_AMS0574 | P76 | Locations-pair |      | 9363  | 9363  | NEW6   | NEW6   | 168  | 168  | same MLST+<br>NGSTAR+ NGMAST      | 2   | <15 | 8    | 2   |
| NG_AMS0575 | NG_AMS0576 | P77 | Locations-pair |      | 10314 | 11706 | 12547  | NEW9   | 1387 | 1869 | different MLST+<br>NGSTAR+ NGMAST | 215 | >15 | 1790 | 186 |
| NG_AMS0577 | NG_AMS0578 | P78 | Locations-pair |      | 8156  | 8156  | UNKN07 | UNKN07 | 442  | 442  | same MLST+<br>NGSTAR+ NGMAST      | 1   | <15 | 10   | 0   |
| NG_AMS0577 | NG_AMS0579 | P78 | Locations-pair |      | 8156  | 8156  | UNKN07 | UNKN07 | 442  | 442  | same MLST+<br>NGSTAR+ NGMAST      | 2   | <15 | 10   | 0   |
| NG_AMS0578 | NG_AMS0579 | P78 | Locations-pair |      | 8156  | 8156  | UNKN07 | UNKN07 | 442  | 442  | same MLST+<br>NGSTAR+ NGMAST      | 2   | <15 | 20   | 0   |
| NG_AMS0580 | NG_AMS0581 | P79 | Locations-pair |      | 9362  | 9362  | NEW7   | NEW7   | 1660 | 1660 | same MLST+<br>NGSTAR+ NGMAST      | 0   | <15 | 0    | 0   |
| NG_AMS0582 | NG_AMS0583 | P80 | Locations-pair |      | 8156  | 8156  | 3674   | 3674   | 442  | 442  | same MLST+<br>NGSTAR+ NGMAST      | 0   | <15 | 9    | 0   |



Table S3. Sensitivity and specificity of the gene-based typing methods MLST, NG-STAR and NG-MAST.

**Within-host pairs (n=130)**

|                                 | MLST Same ST       | Different ST |
|---------------------------------|--------------------|--------------|
| <10 recombination filtered SNPs | 121                | 0            |
| ≥10 recombination filtered SNPs | 0                  | 9            |
|                                 | <b>Sensitivity</b> | <b>100%</b>  |
|                                 | <b>Specificity</b> | <b>100%</b>  |

|                                 | NG-STAR Same ST    | Different ST |
|---------------------------------|--------------------|--------------|
| <10 recombination filtered SNPs | 121                | 0            |
| ≥10 recombination filtered SNPs | 0                  | 9            |
|                                 | <b>Sensitivity</b> | <b>100%</b>  |
|                                 | <b>Specificity</b> | <b>100%</b>  |

|                                 | NG-MAST Same ST    | Different ST |
|---------------------------------|--------------------|--------------|
| <10 recombination filtered SNPs | 112                | 9            |
| ≥10 recombination filtered SNPs | 0                  | 9            |
|                                 | <b>Sensitivity</b> | <b>93%</b>   |
|                                 | <b>Specificity</b> | <b>100%</b>  |

**Within+ between-host pairs (n=303)**

|                                 | MLST Same ST       | Different ST |
|---------------------------------|--------------------|--------------|
| <10 recombination filtered SNPs | 90                 | 0            |
| ≥10 recombination filtered SNPs | 210                | 3            |
|                                 | <b>Sensitivity</b> | <b>100%</b>  |
|                                 | <b>Specificity</b> | <b>1%</b>    |

|                                 | NG-STAR Same ST    | Different ST |
|---------------------------------|--------------------|--------------|
| <10 recombination filtered SNPs | 89                 | 1            |
| ≥10 recombination filtered SNPs | 109                | 104          |
|                                 | <b>Sensitivity</b> | <b>99%</b>   |
|                                 | <b>Specificity</b> | <b>49%</b>   |

|                                 | NG-MAST Same ST    | Different ST |
|---------------------------------|--------------------|--------------|
| <10 recombination filtered SNPs | 85                 | 5            |
| ≥10 recombination filtered SNPs | 45                 | 168          |
|                                 | <b>Sensitivity</b> | <b>94%</b>   |
|                                 | <b>Specificity</b> | <b>79%</b>   |

**Table S4. Characteristics of included within- and between-host isolate pairs and the differences found on the levels of sequence types, cgMLST alleles and SNPs.**

| Isolate1   | Isolate2   | Participant isolate 1 | Participant isolate 2 | Type of comparison | Time point comparison | MLST_iso1 | MLST_iso2 | NG-MAST_iso1 | NG-MAST_iso2 | NG-STAR_iso1 | NG-STAR_iso2 | Gene based typing comparison        | cgMLST_allele_dist | cgMLST_cat | On-filtered SNP distance | Recombination filtered SNP distance |
|------------|------------|-----------------------|-----------------------|--------------------|-----------------------|-----------|-----------|--------------|--------------|--------------|--------------|-------------------------------------|--------------------|------------|--------------------------|-------------------------------------|
| NG_AMS0165 | NG_AMS0547 | P21                   | P65                   | Between-host       |                       | 1901      | 1901      | 1407         | NEW5         | UNKN03       | 128          | same MLST, different NGSTAR+ NGMAST | 299                | >15        | 2640                     | 467                                 |
| NG_AMS0165 | NG_AMS0166 | P21                   | P21                   | Within-host        | t2t3                  | 1901      | 1901      | 1407         | 1407         | UNKN03       | UNKN03       | same MLST+                          | 1                  | <15        | 10                       | 1                                   |
| NG_AMS0184 | NG_AMS0528 | P32                   | P56                   | Between-host       |                       | 7827      | 7827      | 2318         | UNKN04       | 38           | 175          | same MLST, different NGSTAR+ NGMAST | 61                 | >15        | 817                      | 42                                  |
| NG_AMS0184 | NG_AMS0405 | P32                   | P10                   | Between-host       |                       | 7827      | 7827      | 2318         | 10386        | 38           | 38           | same MLST+ NGSTAR, different NGMAST | 44                 | >15        | 689                      | 40                                  |
| NG_AMS0184 | NG_AMS0220 | P32                   | P45                   | Between-host       |                       | 7827      | 7827      | 2318         | 10386        | 38           | 38           | same MLST+ NGSTAR, different NGMAST | 60                 | >15        | 724                      | 49                                  |
| NG_AMS0184 | NG_AMS0185 | P32                   | P32                   | Within-host        |                       | 7827      | 7827      | 2318         | 2318         | 38           | 38           | same MLST+                          | 0                  | <15        | 2                        | 0                                   |
| NG_AMS0191 | NG_AMS0575 | P34                   | P77                   | Between-host       |                       | 10314     | 10314     | 19178        | 12547        | 2730         | 1387         | same MLST, different NGSTAR+ NGMAST | 87                 | >15        | 734                      | 56                                  |
| NG_AMS0191 | NG_AMS0520 | P34                   | P53                   | Between-host       |                       | 10314     | 10314     | 19178        | 19188        | 2730         | 1387         | same MLST, different NGSTAR+ NGMAST | 103                | >15        | 795                      | 58                                  |
| NG_AMS0191 | NG_AMS0545 | P34                   | P64                   | Between-host       |                       | 10314     | 10314     | 19178        | 19188        | 2730         | 1387         | same MLST, different NGSTAR+ NGMAST | 104                | >15        | 813                      | 58                                  |
| NG_AMS0191 | NG_AMS0221 | P34                   | P44                   | Between-host       |                       | 10314     | 10314     | 19178        | 19188        | 2730         | 1387         | same MLST, different NGSTAR+ NGMAST | 103                | >15        | 795                      | 59                                  |
| NG_AMS0191 | NG_AMS0538 | P34                   | P61                   | Between-host       |                       | 10314     | 10314     | 19178        | 19188        | 2730         | 1387         | same MLST, different NGSTAR+ NGMAST | 100                | >15        | 770                      | 59                                  |
| NG_AMS0191 | NG_AMS0469 | P34                   | P34                   | Within-host        | t1t2                  | 10314     | 10314     | 19178        | 19178        | 2730         | 2730         | same MLST+                          | 0                  | <15        | 9                        | 0                                   |
| NG_AMS0206 | NG_AMS0534 | P36                   | P59                   | Between-host       |                       | 1583      | 1583      | 15589        | NEW3         | 3310         | 2875         | same MLST, different NGSTAR+ NGMAST | 203                | >15        | 1471                     | 207                                 |
| NG_AMS0206 | NG_AMS0555 | P36                   | P69                   | Between-host       |                       | 1583      | 1583      | 15589        | 16001        | 3310         | NEW2         | same MLST, different NGSTAR+ NGMAST | 193                | >15        | 1563                     | 216                                 |
| NG_AMS0206 | NG_AMS0480 | P36                   | P39                   | Between-host       |                       | 1583      | 1583      | 15589        | 15589        | 3310         | 1340         | same MLST+ NGMAST, different        | 120                | >15        | 822                      | 97                                  |
| NG_AMS0206 | NG_AMS0475 | P36                   | P36                   | Within-host        | t1t2                  | 1583      | 1583      | 15589        | 15589        | 3310         | 3310         | same MLST+                          | 1                  | <15        | 4                        | 1                                   |
| NG_AMS0220 | NG_AMS0528 | P45                   | P56                   | Between-host       |                       | 7827      | 7827      | 10386        | UNKN04       | 38           | 175          | same MLST, different NGSTAR+ NGMAST | 51                 | >15        | 270                      | 27                                  |
| NG_AMS0220 | NG_AMS0223 | P45                   | P45                   | Within-host        | t1t2                  | 7827      | 7827      | 10386        | 10386        | 38           | 38           | same MLST+                          | 1                  | <15        | 1                        | 0                                   |
| NG_AMS0220 | NG_AMS0405 | P45                   | P10                   | Between-host       |                       | 7827      | 7827      | 10386        | 10386        | 38           | 38           | same MLST+                          | 22                 | >15        | 61                       | 18                                  |

|            |            |     |     |              |      |       |       |       |       |        |        |                                        |     |     |      |     |
|------------|------------|-----|-----|--------------|------|-------|-------|-------|-------|--------|--------|----------------------------------------|-----|-----|------|-----|
| NG_AMS0221 | NG_AMS0575 | P44 | P77 | Between-host |      | 10314 | 10314 | 19188 | 12547 | 1387   | 1387   | same MLST+ NGSTAR,<br>different NGMAST | 37  | >15 | 324  | 31  |
| NG_AMS0221 | NG_AMS0520 | P44 | P53 | Between-host |      | 10314 | 10314 | 19188 | 19188 | 1387   | 1387   | same MLST+                             | 0   | <15 | 7    | 1   |
| NG_AMS0221 | NG_AMS0538 | P44 | P61 | Between-host |      | 10314 | 10314 | 19188 | 19188 | 1387   | 1387   | same MLST+                             | 4   | <15 | 15   | 1   |
| NG_AMS0221 | NG_AMS0545 | P44 | P64 | Between-host |      | 10314 | 10314 | 19188 | 19188 | 1387   | 1387   | same MLST+                             | 3   | <15 | 22   | 1   |
| NG_AMS0221 | NG_AMS0500 | P44 | P44 | Within-host  | t1t2 | 10314 | 10314 | 19188 | 19188 | 1387   | 1387   | same MLST+                             | 0   | <15 | 5    | 1   |
| NG_AMS0245 | NG_AMS0542 | P54 | P63 | Between-host |      | 1599  | 1599  | 13484 | 11461 | 2152   | 520    | same MLST, different<br>NGSTAR+ NGMAST | 116 | >15 | 750  | 57  |
| NG_AMS0245 | NG_AMS0522 | P54 | P54 | Within-host  |      | 1599  | 1599  | 13484 | 13484 | 2152   | 2152   | same MLST+                             | 1   | <15 | 8    | 2   |
| NG_AMS0382 | NG_AMS0517 | P01 | P52 | Between-host |      | 10314 | 7822  | 12547 | 12547 | 1387   | 1387   | different MLST, same<br>NGMAST+ NGSTAR | 124 | >15 | 741  | 123 |
| NG_AMS0382 | NG_AMS0420 | P01 | P14 | Between-host |      | 10314 | 10314 | 12547 | 16065 | 1387   | 1615   | same MLST, different<br>NGSTAR+ NGMAST | 58  | >15 | 463  | 32  |
| NG_AMS0382 | NG_AMS0407 | P01 | P10 | Between-host |      | 10314 | 10314 | 12547 | 16020 | 1387   | UNKN02 | same MLST, different<br>NGSTAR+ NGMAST | 72  | >15 | 578  | 45  |
| NG_AMS0382 | NG_AMS0469 | P01 | P34 | Between-host |      | 10314 | 10314 | 12547 | 19178 | 1387   | 2730   | same MLST, different<br>NGSTAR+ NGMAST | 82  | >15 | 633  | 49  |
| NG_AMS0382 | NG_AMS0520 | P01 | P53 | Between-host |      | 10314 | 10314 | 12547 | 19188 | 1387   | 1387   | same MLST+ NGSTAR,<br>different NGMAST | 25  | >15 | 158  | 16  |
| NG_AMS0382 | NG_AMS0500 | P01 | P44 | Between-host |      | 10314 | 10314 | 12547 | 19188 | 1387   | 1387   | same MLST+ NGSTAR,<br>different NGMAST | 25  | >15 | 164  | 17  |
| NG_AMS0382 | NG_AMS0538 | P01 | P61 | Between-host |      | 10314 | 10314 | 12547 | 19188 | 1387   | 1387   | same MLST+ NGSTAR,<br>different NGMAST | 25  | >15 | 166  | 17  |
| NG_AMS0382 | NG_AMS0545 | P01 | P64 | Between-host |      | 10314 | 10314 | 12547 | 19188 | 1387   | 1387   | same MLST+ NGSTAR,<br>different NGMAST | 25  | >15 | 176  | 17  |
| NG_AMS0382 | NG_AMS0386 | P01 | P01 | Within-host  | t1t2 | 10314 | 10314 | 12547 | 12547 | 1387   | 1387   | same MLST+                             | 0   | <15 | 7    | 0   |
| NG_AMS0382 | NG_AMS0575 | P01 | P77 | Between-host |      | 10314 | 10314 | 12547 | 12547 | 1387   | 1387   | same MLST+                             | 13  | <15 | 185  | 17  |
| NG_AMS0383 | NG_AMS0384 | P02 | P02 | Within-host  |      | 8122  | 8122  | 292   | 292   | 299    | 299    | same MLST+                             | 0   | <15 | 20   | 1   |
| NG_AMS0389 | NG_AMS0497 | P03 | P43 | Between-host |      | 9363  | 9363  | 12302 | 18797 | UNKN01 | 1039   | same MLST, different<br>NGSTAR+ NGMAST | 22  | >15 | 105  | 24  |
| NG_AMS0389 | NG_AMS0573 | P03 | P76 | Between-host |      | 9363  | 9363  | 12302 | NEW6  | UNKN01 | 168    | same MLST, different<br>NGSTAR+ NGMAST | 43  | >15 | 295  | 30  |
| NG_AMS0389 | NG_AMS0569 | P03 | P75 | Between-host |      | 9363  | 9363  | 12302 | 19275 | UNKN01 | 3194   | same MLST, different<br>NGSTAR+ NGMAST | 122 | >15 | 1186 | 110 |
| NG_AMS0389 | NG_AMS0511 | P03 | P49 | Between-host |      | 9363  | 9363  | 12302 | 17495 | UNKN01 | 1964   | same MLST, different<br>NGSTAR+ NGMAST | 132 | >15 | 1721 | 120 |
| NG_AMS0389 | NG_AMS0390 | P03 | P04 | Between-host |      | 9363  | 9363  | 12302 | 17459 | UNKN01 | 301    | same MLST, different<br>NGSTAR+ NGMAST | 232 | >15 | 2420 | 191 |

|            |            |     |     |              |      |      |      |       |        |        |        |                                        |     |     |      |     |
|------------|------------|-----|-----|--------------|------|------|------|-------|--------|--------|--------|----------------------------------------|-----|-----|------|-----|
| NG_AMS0389 | NG_AMS0442 | P03 | P24 | Between-host |      | 9363 | 9363 | 12302 | 12302  | UNKN01 | 168    | same MLST+<br>NGMAST, different        | 23  | >15 | 283  | 18  |
| NG_AMS0389 | NG_AMS0437 | P03 | P22 | Between-host |      | 9363 | 9363 | 12302 | 12302  | UNKN01 | 168    | same MLST+<br>NGMAST, different        | 22  | >15 | 84   | 20  |
| NG_AMS0389 | NG_AMS0408 | P03 | P11 | Between-host |      | 9363 | 9363 | 12302 | 12302  | UNKN01 | 168    | same MLST+<br>NGMAST, different        | 27  | >15 | 182  | 22  |
| NG_AMS0389 | NG_AMS0515 | P03 | P51 | Between-host |      | 9363 | 9363 | 12302 | 12302  | UNKN01 | 168    | same MLST+<br>NGMAST, different        | 27  | >15 | 180  | 22  |
| NG_AMS0389 | NG_AMS0400 | P03 | P08 | Between-host |      | 9363 | 9363 | 12302 | 12302  | UNKN01 | 168    | same MLST+<br>NGMAST, different        | 27  | >15 | 183  | 23  |
| NG_AMS0389 | NG_AMS0396 | P03 | P03 | Within-host  | t1t2 | 9363 | 9363 | 12302 | 12302  | UNKN01 | UNKN01 | same MLST+                             | 0   | <15 | 7    | 1   |
| NG_AMS0390 | NG_AMS0442 | P04 | P24 | Between-host |      | 9363 | 9363 | 17459 | 12302  | 301    | 168    | same MLST, different<br>NGSTAR+ NGMAST | 231 | >15 | 2183 | 185 |
| NG_AMS0390 | NG_AMS0408 | P04 | P11 | Between-host |      | 9363 | 9363 | 17459 | 12302  | 301    | 168    | same MLST, different<br>NGSTAR+ NGMAST | 237 | >15 | 2374 | 188 |
| NG_AMS0390 | NG_AMS0437 | P04 | P22 | Between-host |      | 9363 | 9363 | 17459 | 12302  | 301    | 168    | same MLST, different<br>NGSTAR+ NGMAST | 232 | >15 | 2404 | 188 |
| NG_AMS0390 | NG_AMS0400 | P04 | P08 | Between-host |      | 9363 | 9363 | 17459 | 12302  | 301    | 168    | same MLST, different<br>NGSTAR+ NGMAST | 237 | >15 | 2394 | 189 |
| NG_AMS0390 | NG_AMS0497 | P04 | P43 | Between-host |      | 9363 | 9363 | 17459 | 18797  | 301    | 1039   | same MLST, different<br>NGSTAR+ NGMAST | 231 | >15 | 2424 | 190 |
| NG_AMS0390 | NG_AMS0515 | P04 | P51 | Between-host |      | 9363 | 9363 | 17459 | 12302  | 301    | 168    | same MLST, different<br>NGSTAR+ NGMAST | 236 | >15 | 2382 | 190 |
| NG_AMS0390 | NG_AMS0573 | P04 | P76 | Between-host |      | 9363 | 9363 | 17459 | NEW6   | 301    | 168    | same MLST, different<br>NGSTAR+ NGMAST | 245 | >15 | 2482 | 194 |
| NG_AMS0390 | NG_AMS0511 | P04 | P49 | Between-host |      | 9363 | 9363 | 17459 | 17495  | 301    | 1964   | same MLST, different<br>NGSTAR+ NGMAST | 255 | >15 | 1861 | 223 |
| NG_AMS0390 | NG_AMS0569 | P04 | P75 | Between-host |      | 9363 | 9363 | 17459 | 19275  | 301    | 3194   | same MLST, different<br>NGSTAR+ NGMAST | 294 | >15 | 2837 | 255 |
| NG_AMS0390 | NG_AMS0391 | P04 | P04 | Within-host  |      | 9363 | 9363 | 17459 | 17459  | 301    | 301    | same MLST+                             | 0   | <15 | 9    | 1   |
| NG_AMS0392 | NG_AMS0577 | P05 | P78 | Between-host |      | 8156 | 8156 | 5441  | UNKN07 | 442    | 442    | same MLST+ NGSTAR,<br>different NGMAST | 18  | >15 | 167  | 17  |
| NG_AMS0392 | NG_AMS0446 | P05 | P27 | Between-host |      | 8156 | 8156 | 5441  | UNKN02 | 442    | 442    | same MLST+ NGSTAR,<br>different NGMAST | 53  | >15 | 465  | 61  |
| NG_AMS0392 | NG_AMS0582 | P05 | P80 | Between-host |      | 8156 | 8156 | 5441  | 3674   | 442    | 442    | same MLST+ NGSTAR,<br>different NGMAST | 114 | >15 | 1390 | 101 |
| NG_AMS0392 | NG_AMS0551 | P05 | P67 | Between-host |      | 8156 | 8156 | 5441  | 16928  | 442    | 442    | same MLST+ NGSTAR,<br>different NGMAST | 103 | >15 | 780  | 113 |

|            |            |     |     |              |      |       |       |       |        |      |      |                                        |     |     |      |     |
|------------|------------|-----|-----|--------------|------|-------|-------|-------|--------|------|------|----------------------------------------|-----|-----|------|-----|
| NG_AMS0392 | NG_AMS0536 | P05 | P60 | Between-host |      | 8156  | 8156  | 5441  | 16039  | 442  | 442  | same MLST+ NGSTAR,<br>different NGMAST | 173 | >15 | 1392 | 131 |
| NG_AMS0392 | NG_AMS0394 | P05 | P06 | Between-host |      | 8156  | 8156  | 5441  | 5441   | 442  | 442  | same MLST+                             | 18  | >15 | 170  | 15  |
| NG_AMS0392 | NG_AMS0503 | P05 | P46 | Between-host |      | 8156  | 8156  | 5441  | 5441   | 442  | 442  | same MLST+                             | 26  | >15 | 169  | 19  |
| NG_AMS0392 | NG_AMS0393 | P05 | P05 | Within-host  |      | 8156  | 8156  | 5441  | 5441   | 442  | 442  | same MLST+                             | 0   | <15 | 9    | 1   |
| NG_AMS0392 | NG_AMS0492 | P05 | P42 | Between-host |      | 8156  | 8156  | 5441  | 5441   | 442  | 442  | same MLST+                             | 65  | >15 | 523  | 41  |
| NG_AMS0392 | NG_AMS0502 | P05 | P45 | Between-host |      | 8156  | 8156  | 5441  | 5441   | 442  | 442  | same MLST+                             | 47  | >15 | 361  | 53  |
| NG_AMS0392 | NG_AMS0454 | P05 | P28 | Between-host |      | 8156  | 8156  | 5441  | 5441   | 442  | 442  | same MLST+                             | 78  | >15 | 569  | 73  |
| NG_AMS0394 | NG_AMS0577 | P06 | P78 | Between-host |      | 8156  | 8156  | 5441  | UNKN07 | 442  | 442  | same MLST+ NGSTAR,<br>different NGMAST | 1   | <15 | 21   | 3   |
| NG_AMS0394 | NG_AMS0446 | P06 | P27 | Between-host |      | 8156  | 8156  | 5441  | UNKN02 | 442  | 442  | same MLST+ NGSTAR,<br>different NGMAST | 56  | >15 | 372  | 63  |
| NG_AMS0394 | NG_AMS0582 | P06 | P80 | Between-host |      | 8156  | 8156  | 5441  | 3674   | 442  | 442  | same MLST+ NGSTAR,<br>different NGMAST | 114 | >15 | 1334 | 104 |
| NG_AMS0394 | NG_AMS0551 | P06 | P67 | Between-host |      | 8156  | 8156  | 5441  | 16928  | 442  | 442  | same MLST+ NGSTAR,<br>different NGMAST | 107 | >15 | 773  | 116 |
| NG_AMS0394 | NG_AMS0536 | P06 | P60 | Between-host |      | 8156  | 8156  | 5441  | 16039  | 442  | 442  | same MLST+ NGSTAR,<br>different NGMAST | 178 | >15 | 1311 | 137 |
| NG_AMS0394 | NG_AMS0503 | P06 | P46 | Between-host |      | 8156  | 8156  | 5441  | 5441   | 442  | 442  | same MLST+                             | 10  | <15 | 28   | 8   |
| NG_AMS0394 | NG_AMS0395 | P06 | P06 | Within-host  |      | 8156  | 8156  | 5441  | 5441   | 442  | 442  | same MLST+                             | 0   | <15 | 9    | 0   |
| NG_AMS0394 | NG_AMS0492 | P06 | P42 | Between-host |      | 8156  | 8156  | 5441  | 5441   | 442  | 442  | same MLST+                             | 63  | >15 | 464  | 37  |
| NG_AMS0394 | NG_AMS0502 | P06 | P45 | Between-host |      | 8156  | 8156  | 5441  | 5441   | 442  | 442  | same MLST+                             | 46  | >15 | 265  | 50  |
| NG_AMS0394 | NG_AMS0454 | P06 | P28 | Between-host |      | 8156  | 8156  | 5441  | 5441   | 442  | 442  | same MLST+                             | 79  | >15 | 532  | 77  |
| NG_AMS0397 | NG_AMS0398 | P07 | P07 | Within-host  |      | 12093 | 12093 | 5964  | 5964   | 139  | 139  | same MLST+                             | 0   | <15 | 20   | 7   |
| NG_AMS0400 | NG_AMS0497 | P08 | P43 | Between-host |      | 9363  | 9363  | 12302 | 18797  | 168  | 1039 | same MLST, different<br>NGSTAR+ NGMAST | 16  | >15 | 137  | 20  |
| NG_AMS0400 | NG_AMS0569 | P08 | P75 | Between-host |      | 9363  | 9363  | 12302 | 19275  | 168  | 3194 | same MLST, different<br>NGSTAR+ NGMAST | 121 | >15 | 1224 | 107 |
| NG_AMS0400 | NG_AMS0511 | P08 | P49 | Between-host |      | 9363  | 9363  | 12302 | 17495  | 168  | 1964 | same MLST, different<br>NGSTAR+ NGMAST | 135 | >15 | 1726 | 117 |
| NG_AMS0400 | NG_AMS0573 | P08 | P76 | Between-host |      | 9363  | 9363  | 12302 | NEW6   | 168  | 168  | same MLST+ NGSTAR,<br>different NGMAST | 35  | >15 | 329  | 25  |
| NG_AMS0400 | NG_AMS0408 | P08 | P11 | Between-host |      | 9363  | 9363  | 12302 | 12302  | 168  | 168  | same MLST+                             | 1   | <15 | 13   | 0   |
| NG_AMS0400 | NG_AMS0515 | P08 | P51 | Between-host |      | 9363  | 9363  | 12302 | 12302  | 168  | 168  | same MLST+                             | 4   | <15 | 10   | 3   |
| NG_AMS0400 | NG_AMS0437 | P08 | P22 | Between-host |      | 9363  | 9363  | 12302 | 12302  | 168  | 168  | same MLST+                             | 16  | >15 | 121  | 16  |
| NG_AMS0400 | NG_AMS0442 | P08 | P24 | Between-host |      | 9363  | 9363  | 12302 | 12302  | 168  | 168  | same MLST+                             | 18  | >15 | 323  | 16  |
| NG_AMS0400 | NG_AMS0403 | P08 | P08 | Within-host  | t1t2 | 9363  | 9363  | 12302 | 12302  | 168  | 168  | same MLST+                             | 1   | <15 | 7    | 3   |
| NG_AMS0404 | NG_AMS0564 | P09 | P73 | Between-host |      | 7822  | 7822  | 14994 | 19559  | 1387 | 1615 | same MLST, different<br>NGSTAR+ NGMAST | 29  | >15 | 295  | 24  |

|            |            |     |     |              |      |       |       |       |        |        |      |                                        |     |     |      |      |
|------------|------------|-----|-----|--------------|------|-------|-------|-------|--------|--------|------|----------------------------------------|-----|-----|------|------|
| NG_AMS0404 | NG_AMS0430 | P09 | P20 | Between-host |      | 7822  | 7822  | 14994 | 4995   | 1387   | 3321 | same MLST, different<br>NGSTAR+ NGMAST | 700 | >15 | 4414 | 1463 |
| NG_AMS0404 | NG_AMS0444 | P09 | P26 | Between-host |      | 7822  | 7822  | 14994 | 4995   | 1387   | 3321 | same MLST, different<br>NGSTAR+ NGMAST | 699 | >15 | 4477 | 1477 |
| NG_AMS0404 | NG_AMS0517 | P09 | P52 | Between-host |      | 7822  | 7822  | 14994 | 12547  | 1387   | 1387 | same MLST+ NGSTAR,<br>different NGMAST | 145 | >15 | 1505 | 157  |
| NG_AMS0404 | NG_AMS0540 | P09 | P62 | Between-host |      | 7822  | 7822  | 14994 | 14994  | 1387   | 1387 | same MLST+                             | 28  | >15 | 405  | 20   |
| NG_AMS0404 | NG_AMS0413 | P09 | P09 | Within-host  | t1t2 | 7822  | 7822  | 14994 | 14994  | 1387   | 1387 | same MLST+                             | 0   | <15 | 10   | 0    |
| NG_AMS0404 | NG_AMS0562 | P09 | P72 | Between-host |      | 7822  | 7822  | 14994 | 14994  | 1387   | 1387 | same MLST+                             | 55  | >15 | 469  | 46   |
| NG_AMS0404 | NG_AMS0483 | P09 | P40 | Between-host |      | 7822  | 7822  | 14994 | 14994  | 1387   | 1387 | same MLST+                             | 43  | >15 | 346  | 49   |
| NG_AMS0404 | NG_AMS0553 | P09 | P68 | Between-host |      | 7822  | 7822  | 14994 | 14994  | 1387   | 1387 | same MLST+                             | 70  | >15 | 571  | 77   |
| NG_AMS0405 | NG_AMS0528 | P10 | P56 | Between-host |      | 7827  | 7827  | 10386 | UNKN04 | 38     | 175  | same MLST, different<br>NGSTAR+ NGMAST | 39  | >15 | 232  | 15   |
| NG_AMS0405 | NG_AMS0406 | P10 | P10 | Within-host  |      | 7827  | 7827  | 10386 | 10386  | 38     | 38   | same MLST+                             | 0   | <15 | 2    | 0    |
| NG_AMS0407 | NG_AMS0469 | P10 | P34 | Between-host |      | 10314 | 10314 | 16020 | 19178  | UNKN02 | 2730 | same MLST, different<br>NGSTAR+ NGMAST | 11  | <15 | 73   | 8    |
| NG_AMS0407 | NG_AMS0420 | P10 | P14 | Between-host |      | 10314 | 10314 | 16020 | 16065  | UNKN02 | 1615 | same MLST, different<br>NGSTAR+ NGMAST | 33  | >15 | 233  | 24   |
| NG_AMS0407 | NG_AMS0520 | P10 | P53 | Between-host |      | 10314 | 10314 | 16020 | 19188  | UNKN02 | 1387 | same MLST, different<br>NGSTAR+ NGMAST | 93  | >15 | 743  | 57   |
| NG_AMS0407 | NG_AMS0538 | P10 | P61 | Between-host |      | 10314 | 10314 | 16020 | 19188  | UNKN02 | 1387 | same MLST, different<br>NGSTAR+ NGMAST | 89  | >15 | 717  | 57   |
| NG_AMS0407 | NG_AMS0545 | P10 | P64 | Between-host |      | 10314 | 10314 | 16020 | 19188  | UNKN02 | 1387 | same MLST, different<br>NGSTAR+ NGMAST | 93  | >15 | 757  | 57   |
| NG_AMS0407 | NG_AMS0575 | P10 | P77 | Between-host |      | 10314 | 10314 | 16020 | 12547  | UNKN02 | 1387 | same MLST, different<br>NGSTAR+ NGMAST | 77  | >15 | 685  | 57   |
| NG_AMS0407 | NG_AMS0500 | P10 | P44 | Between-host |      | 10314 | 10314 | 16020 | 19188  | UNKN02 | 1387 | same MLST, different<br>NGSTAR+ NGMAST | 93  | >15 | 750  | 58   |
| NG_AMS0408 | NG_AMS0497 | P11 | P43 | Between-host |      | 9363  | 9363  | 12302 | 18797  | 168    | 1039 | same MLST, different<br>NGSTAR+ NGMAST | 15  | <15 | 135  | 18   |
| NG_AMS0408 | NG_AMS0569 | P11 | P75 | Between-host |      | 9363  | 9363  | 12302 | 19275  | 168    | 3194 | same MLST, different<br>NGSTAR+ NGMAST | 118 | >15 | 1219 | 106  |
| NG_AMS0408 | NG_AMS0511 | P11 | P49 | Between-host |      | 9363  | 9363  | 12302 | 17495  | 168    | 1964 | same MLST, different<br>NGSTAR+ NGMAST | 134 | >15 | 1695 | 116  |
| NG_AMS0408 | NG_AMS0573 | P11 | P76 | Between-host |      | 9363  | 9363  | 12302 | NEW6   | 168    | 168  | same MLST+ NGSTAR,<br>different NGMAST | 34  | >15 | 325  | 24   |
| NG_AMS0408 | NG_AMS0515 | P11 | P51 | Between-host |      | 9363  | 9363  | 12302 | 12302  | 168    | 168  | same MLST+                             | 3   | <15 | 15   | 2    |
| NG_AMS0408 | NG_AMS0442 | P11 | P24 | Between-host |      | 9363  | 9363  | 12302 | 12302  | 168    | 168  | same MLST+                             | 17  | >15 | 319  | 14   |
| NG_AMS0408 | NG_AMS0437 | P11 | P22 | Between-host |      | 9363  | 9363  | 12302 | 12302  | 168    | 168  | same MLST+                             | 15  | <15 | 120  | 16   |

|            |            |     |     |              |      |       |       |        |        |      |      |                                     |     |     |      |     |
|------------|------------|-----|-----|--------------|------|-------|-------|--------|--------|------|------|-------------------------------------|-----|-----|------|-----|
| NG_AMS0408 | NG_AMS0414 | P11 | P11 | Within-host  | t1t2 | 9363  | 9363  | 12302  | 12302  | 168  | 168  | same MLST+                          | 0   | <15 | 2    | 0   |
| NG_AMS0411 | NG_AMS0487 | P12 | P41 | Between-host |      | 1599  | 1599  | 11461  | 18147  | 520  | 3074 | same MLST, different NGSTAR+ NGMAST | 52  | >15 | 551  | 23  |
| NG_AMS0411 | NG_AMS0522 | P12 | P54 | Between-host |      | 1599  | 1599  | 11461  | 13484  | 520  | 2152 | same MLST, different NGSTAR+ NGMAST | 49  | >15 | 389  | 25  |
| NG_AMS0411 | NG_AMS0441 | P12 | P25 | Between-host |      | 1599  | 1599  | 11461  | 14764  | 520  | 520  | same MLST+ NGSTAR, different NGMAST | 30  | >15 | 277  | 19  |
| NG_AMS0411 | NG_AMS0425 | P12 | P17 | Between-host |      | 1599  | 1599  | 11461  | 11461  | 520  | 520  | same MLST+                          | 57  | >15 | 253  | 38  |
| NG_AMS0411 | NG_AMS0542 | P12 | P63 | Between-host |      | 1599  | 1599  | 11461  | 11461  | 520  | 520  | same MLST+                          | 93  | >15 | 486  | 45  |
| NG_AMS0411 | NG_AMS0412 | P12 | P12 | Within-host  |      | 1599  | 1599  | 11461  | 11461  | 520  | 520  | same MLST+                          | 0   | <15 | 13   | 3   |
| NG_AMS0415 | NG_AMS0416 | P13 | P13 | Within-host  |      | NEW1  | NEW1  | 9918   | 9918   | 436  | 436  | same MLST+                          | 0   | <15 | 4    | 1   |
| NG_AMS0420 | NG_AMS0469 | P14 | P34 | Between-host |      | 10314 | 10314 | 16065  | 19178  | 1615 | 2730 | same MLST, different NGSTAR+ NGMAST | 44  | >15 | 291  | 26  |
| NG_AMS0420 | NG_AMS0575 | P14 | P77 | Between-host |      | 10314 | 10314 | 16065  | 12547  | 1615 | 1387 | same MLST, different NGSTAR+ NGMAST | 66  | >15 | 579  | 42  |
| NG_AMS0420 | NG_AMS0520 | P14 | P53 | Between-host |      | 10314 | 10314 | 16065  | 19188  | 1615 | 1387 | same MLST, different NGSTAR+ NGMAST | 81  | >15 | 625  | 43  |
| NG_AMS0420 | NG_AMS0500 | P14 | P44 | Between-host |      | 10314 | 10314 | 16065  | 19188  | 1615 | 1387 | same MLST, different NGSTAR+ NGMAST | 81  | >15 | 627  | 44  |
| NG_AMS0420 | NG_AMS0538 | P14 | P61 | Between-host |      | 10314 | 10314 | 16065  | 19188  | 1615 | 1387 | same MLST, different NGSTAR+ NGMAST | 76  | >15 | 600  | 44  |
| NG_AMS0420 | NG_AMS0545 | P14 | P64 | Between-host |      | 10314 | 10314 | 16065  | 19188  | 1615 | 1387 | same MLST, different NGSTAR+ NGMAST | 80  | >15 | 644  | 44  |
| NG_AMS0421 | NG_AMS0422 | P15 | P15 | Within-host  | t1t2 | 8145  | 8145  | 13470  | 13470  | 3651 | 3651 | same MLST+                          | 0   | <15 | 18   | 2   |
| NG_AMS0423 | NG_AMS0525 | P16 | P55 | Between-host |      | 11422 | 11422 | UNKN01 | 3935   | 2953 | 193  | same MLST, different NGSTAR+ NGMAST | 33  | >15 | 325  | 14  |
| NG_AMS0423 | NG_AMS0424 | P16 | P16 | Within-host  |      | 11422 | 11422 | UNKN01 | UNKN01 | 2953 | 2953 | same MLST+                          | 0   | <15 | 3    | 0   |
| NG_AMS0425 | NG_AMS0522 | P17 | P54 | Between-host |      | 1599  | 1599  | 11461  | 13484  | 520  | 2152 | same MLST, different NGSTAR+ NGMAST | 87  | >15 | 521  | 46  |
| NG_AMS0425 | NG_AMS0487 | P17 | P41 | Between-host |      | 1599  | 1599  | 11461  | 18147  | 520  | 3074 | same MLST, different NGSTAR+ NGMAST | 101 | >15 | 696  | 57  |
| NG_AMS0425 | NG_AMS0441 | P17 | P25 | Between-host |      | 1599  | 1599  | 11461  | 14764  | 520  | 520  | same MLST+ NGSTAR, different NGMAST | 79  | >15 | 436  | 55  |
| NG_AMS0425 | NG_AMS0542 | P17 | P63 | Between-host |      | 1599  | 1599  | 11461  | 11461  | 520  | 520  | same MLST+                          | 53  | >15 | 282  | 29  |
| NG_AMS0425 | NG_AMS0428 | P17 | P17 | Within-host  | t1t2 | 1599  | 1599  | 11461  | 11461  | 520  | 520  | same MLST+                          | 0   | <15 | 4    | 1   |
| NG_AMS0426 | NG_AMS0427 | P18 | P18 | Within-host  |      | 8143  | 8143  | 5624   | 5624   | 426  | 426  | same MLST+                          | 0   | <15 | 4    | 2   |
| NG_AMS0429 | NG_AMS0455 | P19 | P28 | Between-host |      | 11428 | 11428 | NEW8   | 2992   | 63   | 63   | same MLST+ NGSTAR, different NGMAST | 165 | >15 | 1547 | 197 |
| NG_AMS0429 | NG_AMS0431 | P19 | P19 | Within-host  | t1t2 | 11428 | 11428 | NEW8   | NEW8   | 63   | 63   | same MLST+                          | 1   | <15 | 4    | 0   |

|            |            |     |     |              |      |       |       |       |       |      |      |                                        |     |     |      |      |
|------------|------------|-----|-----|--------------|------|-------|-------|-------|-------|------|------|----------------------------------------|-----|-----|------|------|
| NG_AMS0430 | NG_AMS0564 | P20 | P73 | Between-host |      | 7822  | 7822  | 4995  | 19559 | 3321 | 1615 | same MLST, different<br>NGSTAR+ NGMAST | 701 | >15 | 4426 | 1439 |
| NG_AMS0430 | NG_AMS0553 | P20 | P68 | Between-host |      | 7822  | 7822  | 4995  | 14994 | 3321 | 1387 | same MLST, different<br>NGSTAR+ NGMAST | 697 | >15 | 4461 | 1442 |
| NG_AMS0430 | NG_AMS0517 | P20 | P52 | Between-host |      | 7822  | 7822  | 4995  | 12547 | 3321 | 1387 | same MLST, different<br>NGSTAR+ NGMAST | 698 | >15 | 4792 | 1445 |
| NG_AMS0430 | NG_AMS0562 | P20 | P72 | Between-host |      | 7822  | 7822  | 4995  | 14994 | 3321 | 1387 | same MLST, different<br>NGSTAR+ NGMAST | 693 | >15 | 4346 | 1451 |
| NG_AMS0430 | NG_AMS0540 | P20 | P62 | Between-host |      | 7822  | 7822  | 4995  | 14994 | 3321 | 1387 | same MLST, different<br>NGSTAR+ NGMAST | 698 | >15 | 4562 | 1455 |
| NG_AMS0430 | NG_AMS0483 | P20 | P40 | Between-host |      | 7822  | 7822  | 4995  | 14994 | 3321 | 1387 | same MLST, different<br>NGSTAR+ NGMAST | 693 | >15 | 4413 | 1461 |
| NG_AMS0430 | NG_AMS0444 | P20 | P26 | Between-host |      | 7822  | 7822  | 4995  | 4995  | 3321 | 3321 | same MLST+                             | 13  | <15 | 5    | 4    |
| NG_AMS0430 | NG_AMS0432 | P20 | P20 | Within-host  | t1t2 | 7822  | 7822  | 4995  | 4995  | 3321 | 3321 | same MLST+                             | 0   | <15 | 6    | 0    |
| NG_AMS0436 | NG_AMS0477 | P22 | P37 | Between-host |      | 13734 | 13734 | 13489 | 13489 | 3171 | 3171 | same MLST+                             | 1   | <15 | 13   | 2    |
| NG_AMS0437 | NG_AMS0497 | P22 | P43 | Between-host |      | 9363  | 9363  | 12302 | 18797 | 168  | 1039 | same MLST, different<br>NGSTAR+ NGMAST | 5   | <15 | 28   | 11   |
| NG_AMS0437 | NG_AMS0569 | P22 | P75 | Between-host |      | 9363  | 9363  | 12302 | 19275 | 168  | 3194 | same MLST, different<br>NGSTAR+ NGMAST | 111 | >15 | 1132 | 106  |
| NG_AMS0437 | NG_AMS0511 | P22 | P49 | Between-host |      | 9363  | 9363  | 12302 | 17495 | 168  | 1964 | same MLST, different<br>NGSTAR+ NGMAST | 128 | >15 | 1658 | 112  |
| NG_AMS0437 | NG_AMS0573 | P22 | P76 | Between-host |      | 9363  | 9363  | 12302 | NEW6  | 168  | 168  | same MLST+ NGSTAR,<br>different NGMAST | 30  | >15 | 232  | 23   |
| NG_AMS0437 | NG_AMS0442 | P22 | P24 | Between-host |      | 9363  | 9363  | 12302 | 12302 | 168  | 168  | same MLST+                             | 9   | <15 | 222  | 13   |
| NG_AMS0437 | NG_AMS0515 | P22 | P51 | Between-host |      | 9363  | 9363  | 12302 | 12302 | 168  | 168  | same MLST+                             | 14  | <15 | 118  | 17   |
| NG_AMS0437 | NG_AMS0438 | P22 | P22 | Within-host  | t1t2 | 9363  | 9363  | 12302 | 12302 | 168  | 168  | same MLST+                             | 1   | <15 | 4    | 1    |
| NG_AMS0439 | NG_AMS0440 | P23 | P23 | Within-host  | t1t2 | 1580  | 1580  | 1195  | 1195  | 182  | 182  | same MLST+                             | 1   | <15 | 13   | 1    |
| NG_AMS0441 | NG_AMS0487 | P25 | P41 | Between-host |      | 1599  | 1599  | 14764 | 18147 | 520  | 3074 | same MLST, different<br>NGSTAR+ NGMAST | 55  | >15 | 515  | 29   |
| NG_AMS0441 | NG_AMS0522 | P25 | P54 | Between-host |      | 1599  | 1599  | 14764 | 13484 | 520  | 2152 | same MLST, different<br>NGSTAR+ NGMAST | 71  | >15 | 559  | 41   |
| NG_AMS0441 | NG_AMS0542 | P25 | P63 | Between-host |      | 1599  | 1599  | 14764 | 11461 | 520  | 520  | same MLST+ NGSTAR,<br>different NGMAST | 103 | >15 | 575  | 57   |
| NG_AMS0441 | NG_AMS0443 | P25 | P25 | Within-host  | t1t2 | 1599  | 1599  | 14764 | 14764 | 520  | 520  | same MLST+                             | 0   | <15 | 6    | 0    |
| NG_AMS0442 | NG_AMS0497 | P24 | P43 | Between-host |      | 9363  | 9363  | 12302 | 18797 | 168  | 1039 | same MLST, different<br>NGSTAR+ NGMAST | 10  | <15 | 244  | 16   |
| NG_AMS0442 | NG_AMS0569 | P24 | P75 | Between-host |      | 9363  | 9363  | 12302 | 19275 | 168  | 3194 | same MLST, different<br>NGSTAR+ NGMAST | 113 | >15 | 1091 | 102  |



|            |            |     |     |              |      |      |      |        |        |      |      |                                        |     |     |      |      |
|------------|------------|-----|-----|--------------|------|------|------|--------|--------|------|------|----------------------------------------|-----|-----|------|------|
| NG_AMS0442 | NG_AMS0511 | P24 | P49 | Between-host |      | 9363 | 9363 | 12302  | 17495  | 168  | 1964 | same MLST, different<br>NGSTAR+ NGMAST | 127 | >15 | 1460 | 113  |
| NG_AMS0442 | NG_AMS0573 | P24 | P76 | Between-host |      | 9363 | 9363 | 12302  | NEW6   | 168  | 168  | same MLST+ NGSTAR,<br>different NGMAST | 30  | >15 | 378  | 23   |
| NG_AMS0442 | NG_AMS0515 | P24 | P51 | Between-host |      | 9363 | 9363 | 12302  | 12302  | 168  | 168  | same MLST+                             | 16  | >15 | 323  | 15   |
| NG_AMS0442 | NG_AMS0447 | P24 | P24 | Within-host  | t1t2 | 9363 | 9363 | 12302  | 12302  | 168  | 168  | same MLST+                             | 1   | <15 | 6    | 2    |
| NG_AMS0444 | NG_AMS0564 | P26 | P73 | Between-host |      | 7822 | 7822 | 4995   | 19559  | 3321 | 1615 | same MLST, different<br>NGSTAR+ NGMAST | 701 | >15 | 4493 | 1453 |
| NG_AMS0444 | NG_AMS0553 | P26 | P68 | Between-host |      | 7822 | 7822 | 4995   | 14994  | 3321 | 1387 | same MLST, different<br>NGSTAR+ NGMAST | 697 | >15 | 4513 | 1456 |
| NG_AMS0444 | NG_AMS0517 | P26 | P52 | Between-host |      | 7822 | 7822 | 4995   | 12547  | 3321 | 1387 | same MLST, different<br>NGSTAR+ NGMAST | 697 | >15 | 4831 | 1459 |
| NG_AMS0444 | NG_AMS0562 | P26 | P72 | Between-host |      | 7822 | 7822 | 4995   | 14994  | 3321 | 1387 | same MLST, different<br>NGSTAR+ NGMAST | 694 | >15 | 4393 | 1465 |
| NG_AMS0444 | NG_AMS0540 | P26 | P62 | Between-host |      | 7822 | 7822 | 4995   | 14994  | 3321 | 1387 | same MLST, different<br>NGSTAR+ NGMAST | 698 | >15 | 4610 | 1469 |
| NG_AMS0444 | NG_AMS0483 | P26 | P40 | Between-host |      | 7822 | 7822 | 4995   | 14994  | 3321 | 1387 | same MLST, different<br>NGSTAR+ NGMAST | 692 | >15 | 4464 | 1474 |
| NG_AMS0444 | NG_AMS0445 | P26 | P26 | Within-host  |      | 7822 | 7822 | 4995   | 4995   | 3321 | 3321 | same MLST+                             | 1   | <15 | 5    | 1    |
| NG_AMS0446 | NG_AMS0503 | P27 | P46 | Between-host |      | 8156 | 8156 | UNKN02 | 5441   | 442  | 442  | same MLST+ NGSTAR,<br>different NGMAST | 64  | >15 | 374  | 66   |
| NG_AMS0446 | NG_AMS0577 | P27 | P78 | Between-host |      | 8156 | 8156 | UNKN02 | UNKN07 | 442  | 442  | same MLST+ NGSTAR,<br>different NGMAST | 56  | >15 | 370  | 66   |
| NG_AMS0446 | NG_AMS0454 | P27 | P28 | Between-host |      | 8156 | 8156 | UNKN02 | 5441   | 442  | 442  | same MLST+ NGSTAR,<br>different NGMAST | 84  | >15 | 659  | 80   |
| NG_AMS0446 | NG_AMS0492 | P27 | P42 | Between-host |      | 8156 | 8156 | UNKN02 | 5441   | 442  | 442  | same MLST+ NGSTAR,<br>different NGMAST | 105 | >15 | 782  | 88   |
| NG_AMS0446 | NG_AMS0551 | P27 | P67 | Between-host |      | 8156 | 8156 | UNKN02 | 16928  | 442  | 442  | same MLST+ NGSTAR,<br>different NGMAST | 77  | >15 | 759  | 93   |
| NG_AMS0446 | NG_AMS0502 | P27 | P45 | Between-host |      | 8156 | 8156 | UNKN02 | 5441   | 442  | 442  | same MLST+ NGSTAR,<br>different NGMAST | 83  | >15 | 564  | 96   |
| NG_AMS0446 | NG_AMS0582 | P27 | P80 | Between-host |      | 8156 | 8156 | UNKN02 | 3674   | 442  | 442  | same MLST+ NGSTAR,<br>different NGMAST | 150 | >15 | 1606 | 139  |
| NG_AMS0446 | NG_AMS0536 | P27 | P60 | Between-host |      | 8156 | 8156 | UNKN02 | 16039  | 442  | 442  | same MLST+ NGSTAR,<br>different NGMAST | 181 | >15 | 1414 | 150  |
| NG_AMS0446 | NG_AMS0451 | P27 | P27 | Within-host  | t1t2 | 8156 | 8156 | UNKN02 | UNKN02 | 442  | 442  | same MLST+                             | 0   | <15 | 8    | 3    |
| NG_AMS0454 | NG_AMS0577 | P28 | P78 | Between-host |      | 8156 | 8156 | 5441   | UNKN07 | 442  | 442  | same MLST+ NGSTAR,<br>different NGMAST | 78  | >15 | 523  | 79   |

|            |            |     |     |              |      |       |       |       |        |      |      |                                        |     |     |      |     |
|------------|------------|-----|-----|--------------|------|-------|-------|-------|--------|------|------|----------------------------------------|-----|-----|------|-----|
| NG_AMS0454 | NG_AMS0582 | P28 | P80 | Between-host |      | 8156  | 8156  | 5441  | 3674   | 442  | 442  | same MLST+ NGSTAR,<br>different NGMAST | 161 | >15 | 1553 | 144 |
| NG_AMS0454 | NG_AMS0551 | P28 | P67 | Between-host |      | 8156  | 8156  | 5441  | 16928  | 442  | 442  | same MLST+ NGSTAR,<br>different NGMAST | 138 | >15 | 879  | 146 |
| NG_AMS0454 | NG_AMS0536 | P28 | P60 | Between-host |      | 8156  | 8156  | 5441  | 16039  | 442  | 442  | same MLST+ NGSTAR,<br>different NGMAST | 197 | >15 | 1434 | 160 |
| NG_AMS0454 | NG_AMS0503 | P28 | P46 | Between-host |      | 8156  | 8156  | 5441  | 5441   | 442  | 442  | same MLST+                             | 86  | >15 | 530  | 81  |
| NG_AMS0454 | NG_AMS0492 | P28 | P42 | Between-host |      | 8156  | 8156  | 5441  | 5441   | 442  | 442  | same MLST+                             | 122 | >15 | 888  | 97  |
| NG_AMS0454 | NG_AMS0502 | P28 | P45 | Between-host |      | 8156  | 8156  | 5441  | 5441   | 442  | 442  | same MLST+                             | 107 | >15 | 632  | 108 |
| NG_AMS0455 | NG_AMS0530 | P28 | P57 | Between-host |      | 11428 | 9362  | 2992  | 2992   | 63   | 63   | different MLST, same<br>NGMAST+ NGSTAR | 288 | >15 | 1972 | 315 |
| NG_AMS0456 | NG_AMS0458 | P29 | P29 | Within-host  | t1t2 | 12462 | 12462 | 5985  | 5985   | 42   | 42   | same MLST+                             | 0   | <15 | 5    | 0   |
| NG_AMS0459 | NG_AMS0460 | P30 | P30 | Within-host  |      | 13956 | 13956 | 13893 | 13893  | 1295 | 1295 | same MLST+                             | 0   | <15 | 11   | 0   |
| NG_AMS0465 | NG_AMS0467 | P31 | P31 | Within-host  | t1t2 | 11516 | 11516 | NEW2  | NEW2   | 55   | 55   | same MLST+                             | 0   | <15 | 3    | 0   |
| NG_AMS0466 | NG_AMS0468 | P33 | P33 | Within-host  | t1t2 | 8135  | 8135  | 2678  | 2678   | 729  | 729  | same MLST+                             | 1   | <15 | 5    | 1   |
| NG_AMS0472 | NG_AMS0474 | P35 | P35 | Within-host  | t1t2 | 11993 | 11993 | 387   | 387    | NEW1 | NEW1 | same MLST+                             | 0   | <15 | 8    | 1   |
| NG_AMS0477 | NG_AMS0482 | P37 | P37 | Within-host  | t1t2 | 13734 | 13734 | 13489 | 13489  | 3171 | 3171 | same MLST+                             | 1   | <15 | 18   | 2   |
| NG_AMS0478 | NG_AMS0508 | P38 | P48 | Between-host |      | 13489 | 13489 | 14700 | 14700  | 1225 | 1225 | same MLST+                             | 11  | <15 | 75   | 12  |
| NG_AMS0478 | NG_AMS0485 | P38 | P38 | Within-host  | t1t2 | 13489 | 13489 | 14700 | 14700  | 1225 | 1225 | same MLST+                             | 0   | <15 | 15   | 1   |
| NG_AMS0480 | NG_AMS0534 | P39 | P59 | Between-host |      | 1583  | 1583  | 15589 | NEW3   | 1340 | 2875 | same MLST, different<br>NGSTAR+ NGMAST | 113 | >15 | 935  | 128 |
| NG_AMS0480 | NG_AMS0555 | P39 | P69 | Between-host |      | 1583  | 1583  | 15589 | 16001  | 1340 | NEW2 | same MLST, different<br>NGSTAR+ NGMAST | 127 | >15 | 1016 | 139 |
| NG_AMS0480 | NG_AMS0481 | P39 | P39 | Within-host  |      | 1583  | 1583  | 15589 | 15589  | 1340 | 1340 | same MLST+                             | 2   | <15 | 12   | 1   |
| NG_AMS0483 | NG_AMS0564 | P40 | P73 | Between-host |      | 7822  | 7822  | 14994 | 19559  | 1387 | 1615 | same MLST, different<br>NGSTAR+ NGMAST | 66  | >15 | 571  | 71  |
| NG_AMS0483 | NG_AMS0517 | P40 | P52 | Between-host |      | 7822  | 7822  | 14994 | 12547  | 1387 | 1387 | same MLST+ NGSTAR,<br>different NGMAST | 166 | >15 | 1663 | 195 |
| NG_AMS0483 | NG_AMS0540 | P40 | P62 | Between-host |      | 7822  | 7822  | 14994 | 14994  | 1387 | 1387 | same MLST+                             | 62  | >15 | 580  | 72  |
| NG_AMS0483 | NG_AMS0562 | P40 | P72 | Between-host |      | 7822  | 7822  | 14994 | 14994  | 1387 | 1387 | same MLST+                             | 88  | >15 | 649  | 93  |
| NG_AMS0483 | NG_AMS0484 | P40 | P40 | Within-host  |      | 7822  | 7822  | 14994 | 14994  | 1387 | 1387 | same MLST+                             | 0   | <15 | 11   | 1   |
| NG_AMS0483 | NG_AMS0553 | P40 | P68 | Between-host |      | 7822  | 7822  | 14994 | 14994  | 1387 | 1387 | same MLST+                             | 104 | >15 | 774  | 124 |
| NG_AMS0487 | NG_AMS0522 | P41 | P54 | Between-host |      | 1599  | 1599  | 18147 | 13484  | 3074 | 2152 | same MLST, different<br>NGSTAR+ NGMAST | 90  | >15 | 747  | 46  |
| NG_AMS0487 | NG_AMS0542 | P41 | P63 | Between-host |      | 1599  | 1599  | 18147 | 11461  | 3074 | 520  | same MLST, different<br>NGSTAR+ NGMAST | 119 | >15 | 883  | 60  |
| NG_AMS0487 | NG_AMS0493 | P41 | P41 | Within-host  | t1t2 | 1599  | 1599  | 18147 | 18147  | 3074 | 3074 | same MLST+                             | 1   | <15 | 8    | 0   |
| NG_AMS0492 | NG_AMS0577 | P42 | P78 | Between-host |      | 8156  | 8156  | 5441  | UNKN07 | 442  | 442  | same MLST+ NGSTAR,<br>different NGMAST | 62  | >15 | 471  | 40  |

|            |            |     |     |              |      |       |       |       |        |        |        |                                        |     |     |      |     |
|------------|------------|-----|-----|--------------|------|-------|-------|-------|--------|--------|--------|----------------------------------------|-----|-----|------|-----|
| NG_AMS0492 | NG_AMS0582 | P42 | P80 | Between-host |      | 8156  | 8156  | 5441  | 3674   | 442    | 442    | same MLST+ NGSTAR,<br>different NGMAST | 162 | >15 | 1696 | 126 |
| NG_AMS0492 | NG_AMS0551 | P42 | P67 | Between-host |      | 8156  | 8156  | 5441  | 16928  | 442    | 442    | same MLST+ NGSTAR,<br>different NGMAST | 153 | >15 | 1126 | 137 |
| NG_AMS0492 | NG_AMS0536 | P42 | P60 | Between-host |      | 8156  | 8156  | 5441  | 16039  | 442    | 442    | same MLST+ NGSTAR,<br>different NGMAST | 198 | >15 | 1489 | 140 |
| NG_AMS0492 | NG_AMS0503 | P42 | P46 | Between-host |      | 8156  | 8156  | 5441  | 5441   | 442    | 442    | same MLST+                             | 70  | >15 | 478  | 42  |
| NG_AMS0492 | NG_AMS0502 | P42 | P45 | Between-host |      | 8156  | 8156  | 5441  | 5441   | 442    | 442    | same MLST+                             | 93  | >15 | 629  | 74  |
| NG_AMS0492 | NG_AMS0496 | P42 | P42 | Within-host  | t1t2 | 8156  | 8156  | 5441  | 5441   | 442    | 442    | same MLST+                             | 0   | <15 | 9    | 0   |
| NG_AMS0497 | NG_AMS0515 | P43 | P51 | Between-host |      | 9363  | 9363  | 18797 | 12302  | 1039   | 168    | same MLST, different<br>NGSTAR+ NGMAST | 14  | <15 | 138  | 19  |
| NG_AMS0497 | NG_AMS0573 | P43 | P76 | Between-host |      | 9363  | 9363  | 18797 | NEW6   | 1039   | 168    | same MLST, different<br>NGSTAR+ NGMAST | 30  | >15 | 254  | 26  |
| NG_AMS0497 | NG_AMS0569 | P43 | P75 | Between-host |      | 9363  | 9363  | 18797 | 19275  | 1039   | 3194   | same MLST, different<br>NGSTAR+ NGMAST | 110 | >15 | 1161 | 108 |
| NG_AMS0497 | NG_AMS0511 | P43 | P49 | Between-host |      | 9363  | 9363  | 18797 | 17495  | 1039   | 1964   | same MLST, different<br>NGSTAR+ NGMAST | 126 | >15 | 1681 | 117 |
| NG_AMS0497 | NG_AMS0498 | P43 | P43 | Within-host  |      | 9363  | 9363  | 18797 | 18797  | 1039   | 1039   | same MLST+                             | 1   | <15 | 4    | 1   |
| NG_AMS0502 | NG_AMS0577 | P45 | P78 | Between-host |      | 8156  | 8156  | 5441  | UNKN07 | 442    | 442    | same MLST+ NGSTAR,<br>different NGMAST | 46  | >15 | 269  | 51  |
| NG_AMS0502 | NG_AMS0582 | P45 | P80 | Between-host |      | 8156  | 8156  | 5441  | 3674   | 442    | 442    | same MLST+ NGSTAR,<br>different NGMAST | 134 | >15 | 1442 | 130 |
| NG_AMS0502 | NG_AMS0551 | P45 | P67 | Between-host |      | 8156  | 8156  | 5441  | 16928  | 442    | 442    | same MLST+ NGSTAR,<br>different NGMAST | 128 | >15 | 912  | 142 |
| NG_AMS0502 | NG_AMS0536 | P45 | P60 | Between-host |      | 8156  | 8156  | 5441  | 16039  | 442    | 442    | same MLST+ NGSTAR,<br>different NGMAST | 196 | >15 | 1367 | 161 |
| NG_AMS0502 | NG_AMS0503 | P45 | P46 | Between-host |      | 8156  | 8156  | 5441  | 5441   | 442    | 442    | same MLST+                             | 56  | >15 | 264  | 54  |
| NG_AMS0503 | NG_AMS0577 | P46 | P78 | Between-host |      | 8156  | 8156  | 5441  | UNKN07 | 442    | 442    | same MLST+ NGSTAR,<br>different NGMAST | 11  | <15 | 34   | 10  |
| NG_AMS0503 | NG_AMS0582 | P46 | P80 | Between-host |      | 8156  | 8156  | 5441  | 3674   | 442    | 442    | same MLST+ NGSTAR,<br>different NGMAST | 122 | >15 | 1323 | 107 |
| NG_AMS0503 | NG_AMS0551 | P46 | P67 | Between-host |      | 8156  | 8156  | 5441  | 16928  | 442    | 442    | same MLST+ NGSTAR,<br>different NGMAST | 115 | >15 | 766  | 120 |
| NG_AMS0503 | NG_AMS0536 | P46 | P60 | Between-host |      | 8156  | 8156  | 5441  | 16039  | 442    | 442    | same MLST+ NGSTAR,<br>different NGMAST | 183 | >15 | 1313 | 140 |
| NG_AMS0503 | NG_AMS0505 | P46 | P46 | Within-host  | t1t2 | 8156  | 8156  | 5441  | 5441   | 442    | 442    | same MLST+                             | 0   | <15 | 4    | 0   |
| NG_AMS0506 | NG_AMS0510 | P47 | P47 | Within-host  | t1t2 | 14399 | 14399 | 19665 | 19665  | UNKN04 | UNKN04 | same MLST+                             | 2   | <15 | 6    | 2   |
| NG_AMS0508 | NG_AMS0509 | P48 | P48 | Within-host  |      | 13489 | 13489 | 14700 | 14700  | 1225   | 1225   | same MLST+                             | 0   | <15 | 10   | 1   |

|            |            |     |     |              |      |       |       |        |        |      |      |                                        |     |     |      |     |
|------------|------------|-----|-----|--------------|------|-------|-------|--------|--------|------|------|----------------------------------------|-----|-----|------|-----|
| NG_AMS0511 | NG_AMS0515 | P49 | P51 | Between-host |      | 9363  | 9363  | 17495  | 12302  | 1964 | 168  | same MLST, different<br>NGSTAR+ NGMAST | 133 | >15 | 1688 | 116 |
| NG_AMS0511 | NG_AMS0573 | P49 | P76 | Between-host |      | 9363  | 9363  | 17495  | NEW6   | 1964 | 168  | same MLST, different<br>NGSTAR+ NGMAST | 145 | >15 | 1790 | 121 |
| NG_AMS0511 | NG_AMS0569 | P49 | P75 | Between-host |      | 9363  | 9363  | 17495  | 19275  | 1964 | 3194 | same MLST, different<br>NGSTAR+ NGMAST | 200 | >15 | 2208 | 191 |
| NG_AMS0511 | NG_AMS0512 | P49 | P49 | Within-host  |      | 9363  | 9363  | 17495  | 17495  | 1964 | 1964 | same MLST+                             | 1   | <15 | 11   | 3   |
| NG_AMS0513 | NG_AMS0514 | P50 | P50 | Within-host  |      | 10317 | 10317 | 5268   | 5268   | 178  | 178  | same MLST+                             | 0   | <15 | 5    | 0   |
| NG_AMS0515 | NG_AMS0569 | P51 | P75 | Between-host |      | 9363  | 9363  | 12302  | 19275  | 168  | 3194 | same MLST, different<br>NGSTAR+ NGMAST | 119 | >15 | 1230 | 106 |
| NG_AMS0515 | NG_AMS0573 | P51 | P76 | Between-host |      | 9363  | 9363  | 12302  | NEW6   | 168  | 168  | same MLST+ NGSTAR,<br>different NGMAST | 37  | >15 | 327  | 26  |
| NG_AMS0516 | NG_AMS0519 | P51 | P51 | Within-host  | t1t2 | 9363  | 9363  | 12302  | 12302  | 168  | 168  | same MLST+                             | 4   | <15 | 6    | 2   |
| NG_AMS0517 | NG_AMS0575 | P52 | P77 | Between-host |      | 7822  | 10314 | 12547  | 12547  | 1387 | 1387 | different MLST, same<br>NGMAST+ NGSTAR | 127 | >15 | 814  | 133 |
| NG_AMS0517 | NG_AMS0564 | P52 | P73 | Between-host |      | 7822  | 7822  | 12547  | 19559  | 1387 | 1615 | same MLST, different<br>NGSTAR+ NGMAST | 161 | >15 | 1662 | 175 |
| NG_AMS0517 | NG_AMS0540 | P52 | P62 | Between-host |      | 7822  | 7822  | 12547  | 14994  | 1387 | 1387 | same MLST+ NGSTAR,<br>different NGMAST | 147 | >15 | 1676 | 161 |
| NG_AMS0517 | NG_AMS0562 | P52 | P72 | Between-host |      | 7822  | 7822  | 12547  | 14994  | 1387 | 1387 | same MLST+ NGSTAR,<br>different NGMAST | 174 | >15 | 1637 | 204 |
| NG_AMS0517 | NG_AMS0553 | P52 | P68 | Between-host |      | 7822  | 7822  | 12547  | 14994  | 1387 | 1387 | same MLST+ NGSTAR,<br>different NGMAST | 186 | >15 | 1672 | 222 |
| NG_AMS0517 | NG_AMS0518 | P52 | P52 | Within-host  |      | 7822  | 7822  | 12547  | 12547  | 1387 | 1387 | same MLST+                             | 0   | <15 | 14   | 1   |
| NG_AMS0520 | NG_AMS0575 | P53 | P77 | Between-host |      | 10314 | 10314 | 19188  | 12547  | 1387 | 1387 | same MLST+ NGSTAR,<br>different NGMAST | 37  | >15 | 315  | 29  |
| NG_AMS0520 | NG_AMS0545 | P53 | P64 | Between-host |      | 10314 | 10314 | 19188  | 19188  | 1387 | 1387 | same MLST+                             | 3   | <15 | 14   | 0   |
| NG_AMS0520 | NG_AMS0538 | P53 | P61 | Between-host |      | 10314 | 10314 | 19188  | 19188  | 1387 | 1387 | same MLST+                             | 4   | <15 | 17   | 1   |
| NG_AMS0520 | NG_AMS0521 | P53 | P53 | Within-host  |      | 10314 | 10314 | 19188  | 19188  | 1387 | 1387 | same MLST+                             | 1   | <15 | 4    | 0   |
| NG_AMS0525 | NG_AMS0526 | P55 | P55 | Within-host  |      | 11422 | 11422 | 3935   | 3935   | 193  | 193  | same MLST+                             | 0   | <15 | 3    | 1   |
| NG_AMS0528 | NG_AMS0529 | P56 | P56 | Within-host  | t1t2 | 7827  | 7827  | UNKN04 | UNKN04 | 175  | 175  | same MLST+                             | 1   | <15 | 16   | 2   |
| NG_AMS0530 | NG_AMS0580 | P57 | P79 | Between-host |      | 9362  | 9362  | 2992   | NEW7   | 63   | 1660 | same MLST, different<br>NGSTAR+ NGMAST | 321 | >15 | 2729 | 424 |
| NG_AMS0530 | NG_AMS0531 | P57 | P57 | Within-host  |      | 9362  | 9362  | 2992   | 2992   | 63   | 63   | same MLST+                             | 1   | <15 | 2    | 0   |
| NG_AMS0532 | NG_AMS0533 | P58 | P58 | Within-host  |      | 1893  | 1893  | 860    | 860    | 1576 | 1576 | same MLST+                             | 0   | <15 | 12   | 5   |
| NG_AMS0534 | NG_AMS0555 | P59 | P69 | Between-host |      | 1583  | 1583  | NEW3   | 16001  | 2875 | NEW2 | same MLST, different<br>NGSTAR+ NGMAST | 189 | >15 | 1652 | 245 |
| NG_AMS0536 | NG_AMS0577 | P60 | P78 | Between-host |      | 8156  | 8156  | 16039  | UNKN07 | 442  | 442  | same MLST+ NGSTAR,<br>different NGMAST | 178 | >15 | 1315 | 140 |

|            |            |     |     |              |      |       |       |       |        |      |      |                                        |     |     |      |     |
|------------|------------|-----|-----|--------------|------|-------|-------|-------|--------|------|------|----------------------------------------|-----|-----|------|-----|
| NG_AMS0536 | NG_AMS0582 | P60 | P80 | Between-host |      | 8156  | 8156  | 16039 | 3674   | 442  | 442  | same MLST+ NGSTAR,<br>different NGMAST | 241 | >15 | 2161 | 188 |
| NG_AMS0536 | NG_AMS0551 | P60 | P67 | Between-host |      | 8156  | 8156  | 16039 | 16928  | 442  | 442  | same MLST+ NGSTAR,<br>different NGMAST | 204 | >15 | 1596 | 191 |
| NG_AMS0536 | NG_AMS0537 | P60 | P60 | Within-host  |      | 8156  | 8156  | 16039 | 16039  | 442  | 442  | same MLST+                             | 0   | <15 | 3    | 1   |
| NG_AMS0538 | NG_AMS0575 | P61 | P77 | Between-host |      | 10314 | 10314 | 19188 | 12547  | 1387 | 1387 | same MLST+ NGSTAR,<br>different NGMAST | 37  | >15 | 302  | 30  |
| NG_AMS0538 | NG_AMS0539 | P61 | P61 | Within-host  |      | 10314 | 10314 | 19188 | NEW4   | 1387 | 1387 | same MLST+ NGSTAR,<br>different NGMAST | 2   | <15 | 145  | 3   |
| NG_AMS0538 | NG_AMS0545 | P61 | P64 | Between-host |      | 10314 | 10314 | 19188 | 19188  | 1387 | 1387 | same MLST+                             | 0   | <15 | 30   | 1   |
| NG_AMS0540 | NG_AMS0564 | P62 | P73 | Between-host |      | 7822  | 7822  | 14994 | 19559  | 1387 | 1615 | same MLST, different<br>NGSTAR+ NGMAST | 49  | >15 | 566  | 46  |
| NG_AMS0540 | NG_AMS0562 | P62 | P72 | Between-host |      | 7822  | 7822  | 14994 | 14994  | 1387 | 1387 | same MLST+                             | 71  | >15 | 623  | 68  |
| NG_AMS0540 | NG_AMS0553 | P62 | P68 | Between-host |      | 7822  | 7822  | 14994 | 14994  | 1387 | 1387 | same MLST+                             | 83  | >15 | 783  | 94  |
| NG_AMS0540 | NG_AMS0541 | P62 | P62 | Within-host  |      | 7822  | 7822  | 14994 | 14994  | 1387 | 1387 | same MLST+                             | 0   | <15 | 9    | 1   |
| NG_AMS0542 | NG_AMS0543 | P63 | P63 | Within-host  |      | 1599  | 1599  | 11461 | 11461  | 520  | 520  | same MLST+                             | 0   | <15 | 3    | 2   |
| NG_AMS0545 | NG_AMS0575 | P64 | P77 | Between-host |      | 10314 | 10314 | 19188 | 12547  | 1387 | 1387 | same MLST+ NGSTAR,<br>different NGMAST | 37  | >15 | 328  | 29  |
| NG_AMS0547 | NG_AMS0548 | P65 | P65 | Within-host  |      | 1901  | 1901  | NEW5  | NEW5   | 128  | 128  | same MLST+                             | 1   | <15 | 9    | 3   |
| NG_AMS0549 | NG_AMS0560 | P66 | P71 | Between-host |      | 11706 | 11706 | 17972 | UNKN06 | 1869 | 1869 | same MLST+ NGSTAR,<br>different NGMAST | 35  | >15 | 181  | 38  |
| NG_AMS0549 | NG_AMS0576 | P66 | P77 | Between-host |      | 11706 | 11706 | 17972 | NEW9   | 1869 | 1869 | same MLST+ NGSTAR,<br>different NGMAST | 36  | >15 | 188  | 39  |
| NG_AMS0549 | NG_AMS0557 | P66 | P70 | Between-host |      | 11706 | 11706 | 17972 | 17972  | 1869 | 1869 | same MLST+                             | 16  | >15 | 64   | 5   |
| NG_AMS0549 | NG_AMS0567 | P66 | P74 | Between-host |      | 11706 | 11706 | 17972 | 17972  | 1869 | 1869 | same MLST+                             | 71  | >15 | 424  | 66  |
| NG_AMS0549 | NG_AMS0550 | P66 | P66 | Within-host  |      | 11706 | 11706 | 17972 | 17972  | 1869 | 1869 | same MLST+                             | 15  | <15 | 67   | 6   |
| NG_AMS0551 | NG_AMS0577 | P67 | P78 | Between-host |      | 8156  | 8156  | 16928 | UNKN07 | 442  | 442  | same MLST+ NGSTAR,<br>different NGMAST | 107 | >15 | 747  | 119 |
| NG_AMS0551 | NG_AMS0582 | P67 | P80 | Between-host |      | 8156  | 8156  | 16928 | 3674   | 442  | 442  | same MLST+ NGSTAR,<br>different NGMAST | 185 | >15 | 1808 | 174 |
| NG_AMS0551 | NG_AMS0552 | P67 | P67 | Within-host  |      | 8156  | 8156  | 16928 | 16928  | 442  | 442  | same MLST+                             | 0   | <15 | 12   | 2   |
| NG_AMS0553 | NG_AMS0564 | P68 | P73 | Between-host |      | 7822  | 7822  | 14994 | 19559  | 1387 | 1615 | same MLST, different<br>NGSTAR+ NGMAST | 89  | >15 | 733  | 99  |
| NG_AMS0553 | NG_AMS0562 | P68 | P72 | Between-host |      | 7822  | 7822  | 14994 | 14994  | 1387 | 1387 | same MLST+                             | 95  | >15 | 676  | 103 |
| NG_AMS0553 | NG_AMS0554 | P68 | P68 | Within-host  | t1t2 | 7822  | 7822  | 14994 | 14994  | 1387 | 1387 | same MLST+                             | 0   | <15 | 9    | 0   |
| NG_AMS0555 | NG_AMS0556 | P69 | P69 | Within-host  |      | 1583  | 1583  | 16001 | UNKN05 | NEW2 | NEW2 | same MLST+ NGSTAR,<br>different NGMAST | 0   | <15 | 5    | 1   |
| NG_AMS0557 | NG_AMS0560 | P70 | P71 | Between-host |      | 11706 | 11706 | 17972 | UNKN06 | 1869 | 1869 | same MLST+ NGSTAR,<br>different NGMAST | 33  | >15 | 174  | 33  |

|            |            |     |     |              |      |       |       |        |        |      |      |                                        |     |     |      |     |
|------------|------------|-----|-----|--------------|------|-------|-------|--------|--------|------|------|----------------------------------------|-----|-----|------|-----|
| NG_AMS0557 | NG_AMS0576 | P70 | P77 | Between-host |      | 11706 | 11706 | 17972  | NEW9   | 1869 | 1869 | same MLST+ NGSTAR,<br>different NGMAST | 32  | >15 | 185  | 33  |
| NG_AMS0557 | NG_AMS0567 | P70 | P74 | Between-host |      | 11706 | 11706 | 17972  | 17972  | 1869 | 1869 | same MLST+                             | 67  | >15 | 426  | 62  |
| NG_AMS0557 | NG_AMS0558 | P70 | P70 | Within-host  |      | 11706 | 11706 | 17972  | 17972  | 1869 | 1869 | same MLST+                             | 2   | <15 | 8    | 0   |
| NG_AMS0560 | NG_AMS0576 | P71 | P77 | Between-host |      | 11706 | 11706 | UNKN06 | NEW9   | 1869 | 1869 | same MLST+ NGSTAR,<br>different NGMAST | 5   | <15 | 42   | 11  |
| NG_AMS0560 | NG_AMS0567 | P71 | P74 | Between-host |      | 11706 | 11706 | UNKN06 | 17972  | 1869 | 1869 | same MLST+ NGSTAR,<br>different NGMAST | 49  | >15 | 320  | 48  |
| NG_AMS0560 | NG_AMS0561 | P71 | P71 | Within-host  |      | 11706 | 11706 | UNKN06 | 17972  | 1869 | 1869 | same MLST+ NGSTAR,<br>different NGMAST | 0   | <15 | 15   | 0   |
| NG_AMS0562 | NG_AMS0564 | P72 | P73 | Between-host |      | 7822  | 7822  | 14994  | 19559  | 1387 | 1615 | same MLST, different<br>NGSTAR+ NGMAST | 79  | >15 | 652  | 69  |
| NG_AMS0562 | NG_AMS0563 | P72 | P72 | Within-host  |      | 7822  | 7822  | 14994  | 14994  | 1387 | 1387 | same MLST+                             | 0   | <15 | 6    | 1   |
| NG_AMS0564 | NG_AMS0565 | P73 | P73 | Within-host  |      | 7822  | 7822  | 19559  | 19559  | 1615 | 1615 | same MLST+                             | 0   | <15 | 11   | 0   |
| NG_AMS0567 | NG_AMS0576 | P74 | P77 | Between-host |      | 11706 | 11706 | 17972  | NEW9   | 1869 | 1869 | same MLST+ NGSTAR,<br>different NGMAST | 48  | >15 | 312  | 46  |
| NG_AMS0567 | NG_AMS0568 | P74 | P74 | Within-host  |      | 11706 | 11706 | 17972  | 17972  | 1869 | 1869 | same MLST+                             | 0   | <15 | 10   | 3   |
| NG_AMS0569 | NG_AMS0573 | P75 | P76 | Between-host |      | 9363  | 9363  | 19275  | NEW6   | 3194 | 168  | same MLST, different<br>NGSTAR+ NGMAST | 128 | >15 | 1257 | 115 |
| NG_AMS0569 | NG_AMS0571 | P75 | P75 | Within-host  | t1t2 | 9363  | 9363  | 19275  | 19275  | 3194 | 3194 | same MLST+                             | 1   | <15 | 6    | 1   |
| NG_AMS0573 | NG_AMS0574 | P76 | P76 | Within-host  |      | 9363  | 9363  | NEW6   | NEW6   | 168  | 168  | same MLST+                             | 2   | <15 | 8    | 2   |
| NG_AMS0577 | NG_AMS0582 | P78 | P80 | Between-host |      | 8156  | 8156  | UNKN07 | 3674   | 442  | 442  | same MLST+ NGSTAR,<br>different NGMAST | 111 | >15 | 1329 | 106 |
| NG_AMS0577 | NG_AMS0578 | P78 | P78 | Within-host  |      | 8156  | 8156  | UNKN07 | UNKN07 | 442  | 442  | same MLST+                             | 1   | <15 | 10   | 0   |
| NG_AMS0580 | NG_AMS0581 | P79 | P79 | Within-host  |      | 9362  | 9362  | NEW7   | NEW7   | 1660 | 1660 | same MLST+                             | 0   | <15 | 0    | 0   |
| NG_AMS0582 | NG_AMS0583 | P80 | P80 | Within-host  |      | 8156  | 8156  | 3674   | 3674   | 442  | 442  | same MLST+                             | 0   | <15 | 9    | 0   |
